# Supplementary material for: Assessing the accuracy of OpenET satellite-based evapotranspiration data to support water resource and land management applications
Source: Springer Nature journal article supplement (doi:10.1038/s44221-023-00181-7), 2024-01-15
Supplement: 44221_2023_181_MOESM1_ESM.pdf [file 44221_2023_181_MOESM1_ESM.pdf]

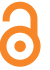

---

# Assessing the accuracy of OpenET satellite-based evapotranspiration data to support water resource and land management applications

---

In the format provided by the authors and unedited

Supplementary Information for “Assessing the accuracy of OpenET satellite-based evapotranspiration data to support water resource and land management applications”

**Supplementary Table 1.** A list of *in situ* ET stations used in this study, including key metadata. Land cover classification and mean daily energy balance closure assignment and calculations are described in Volk et al.<sup>1,2</sup>.

| Site ID | General classification | State | Data source/network | Period of record | Energy balance | Latitude | Longitude | Elevation (m) | Land cover details                                                  | Land cover type  | Measurement technique |
|---------|------------------------|-------|---------------------|------------------|----------------|----------|-----------|---------------|---------------------------------------------------------------------|------------------|-----------------------|
| US-A32  | Grasslands             | OK    | AmeriFlux           | 06/2015-06/2017  | 0.90           | 36.8193  | -97.81977 | 335           | Hay pasture                                                         | Grasslands       | Eddy covariance       |
| US-A74  | Croplands              | OK    | AmeriFlux           | 01/2016-10/2017  | 0.92           | 36.8085  | -97.54885 | 337           | Sorghum                                                             | Annual crops     | Eddy covariance       |
| US-ADR  | Shrublands             | NV    | AmeriFlux           | 05/2011-05/2017  | 0.92           | 36.7653  | -116.6933 | 842           | Greasewood                                                          | Shrublands       | Eddy covariance       |
| US-AR1  | Croplands              | OK    | AmeriFlux           | 06/2009-12/2012  | 1.09           | 36.4267  | -99.42    | 611           | Planted Switchgrass                                                 | Annual crops     | Eddy covariance       |
| US-ARb  | Grasslands             | OK    | AmeriFlux           | 03/2005-10/2006  | 1.01           | 35.5497  | -98.0402  | 424           | Native tallgrass prairie                                            | Grasslands       | Eddy covariance       |
| US-ARc  | Grasslands             | OK    | AmeriFlux           | 03/2005-10/2006  | 1.02           | 35.5465  | -98.04    | 424           | Native tallgrass prairie (burned in March 2005)                     | Grasslands       | Eddy covariance       |
| US-ARM  | Croplands              | OK    | AmeriFlux           | 01/2003-09/2020  | 0.87           | 36.6058  | -97.4888  | 314           | Winter wheat, corn, soy,                                            | Annual crops     | Eddy covariance       |
| US-Aud  | Grasslands             | AZ    | AmeriFlux           | 06/2002-09/2011  | 1.14           | 31.5907  | -110.5104 | 1469          | Madrean mixed grass                                                 | Grasslands       | Eddy covariance       |
| US-Bi1  | Croplands              | CA    | AmeriFlux           | 08/2016-12/2019  | 0.78           | 38.0992  | -121.4993 | -2.7          | Alfalfa                                                             | Annual crops     | Eddy covariance       |
| US-Bi2  | Croplands              | CA    | AmeriFlux           | 04/2017-07/2020  | 0.80           | 38.109   | -121.535  | -4.98         | Corn                                                                | Annual crops     | Eddy covariance       |
| US-Bkg  | Croplands              | SD    | AmeriFlux           | 04/2004-03/2010  | 0.99           | 44.3453  | -96.83617 | 510           | Native grass pasture                                                | Annual crops     | Eddy covariance       |
| US-Blk  | Evergreen Forests      | SD    | AmeriFlux           | 01/2004-04/2008  | 0.94           | 44.158   | -103.65   | 1718          | Ponderosa pine                                                      | Evergreen Forest | Eddy covariance       |
| US-Blo  | Evergreen Forests      | CA    | AmeriFlux           | 06/1997-10/2007  | 0.93           | 38.8953  | -120.6328 | 1315          | Ponderosa pine plantation, mixed-Corn (2005, 2007) and soy          | Evergreen Forest | Eddy covariance       |
| US-Bo1  | Croplands              | IL    | AmeriFlux           | 08/1996-04/2008  | 0.84           | 40.0062  | -88.2904  | 219           | rotation (2006, 2008), no-                                          | Annual crops     | Eddy covariance       |
| US-Br1  | Croplands              | IA    | AmeriFlux           | 04/2005-11/2011  | 0.81           | 41.9749  | -93.6906  | 313           | Corn and soy rotation                                               | Annual crops     | Eddy covariance       |
| US-Br3  | Croplands              | IA    | AmeriFlux           | 01/2005-11/2011  | 0.81           | 41.9747  | -93.69357 | 313           | Corn and soy rotation                                               | Annual crops     | Eddy covariance       |
| US-Ced  | Shrublands             | NJ    | AmeriFlux           | 07/2005-12/2014  | 1.08           | 39.8379  | -74.3791  | 58            | Pitch pine prescribed                                               | Shrublands       | Eddy covariance       |
| US-CMW  | Wetland/Riparian       | AZ    | AmeriFlux           | 03/2001-12/2019  | 0.87           | 31.6637  | -110.1777 | 1199          | Riparian mesquite                                                   | Riparian         | Eddy covariance       |
| US-CRT  | Croplands              | OH    | AmeriFlux           | 01/2011-12/2013  | 0.77           | 41.6285  | -83.34709 | 180           | Soy and winter wheat, no                                            | Annual crops     | Eddy covariance       |
| US-Ctn  | Grasslands             | SD    | AmeriFlux           | 11/2006-09/2009  | 0.71           | 43.95    | -101.8466 | 744           | Grasslands                                                          | Grasslands       | Eddy covariance       |
| US-CZ3  | Evergreen Forests      | CA    | AmeriFlux           | 07/2011-10/2016  | 1.21           | 37.0674  | -119.1951 | 2015          | Pine/fir forest                                                     | Evergreen Forest | Eddy covariance       |
| US-Dix  | Mixed Forests          | NJ    | AmeriFlux           | 04/2005-04/2008  | 1.06           | 39.9712  | -74.43455 | 48            | Oak/pine forest                                                     | Mixed Forests    | Eddy covariance       |
| US-Dk1  | Croplands              | NC    | AmeriFlux           | 01/2006-11/2008  | 0.87           | 35.9712  | -79.09338 | 168           | Grass (Festuca)                                                     | Annual crops     | Eddy covariance       |
| US-Dk2  | Mixed Forests          | NC    | AmeriFlux           | 07/2006-04/2008  | 0.89           | 35.9736  | -79.10043 | 168           | Mature oak-hickory forest                                           | Mixed Forests    | Eddy covariance       |
| US-Esm  | Wetland/Riparian       | FL    | AmeriFlux           | 01/2008-11/2013  | 0.80           | 25.4379  | -80.5946  | 1.07          | Everglades peat and marl forming wetlands                           | Wetlands         | Eddy covariance       |
| US-Fmf  | Evergreen Forests      | AZ    | AmeriFlux           | 08/2005-12/2010  | 0.83           | 35.1426  | -111.7273 | 2160          | Ponderosa pine forest                                               | Evergreen Forest | Eddy covariance       |
| US-FPe  | Grasslands             | MT    | AmeriFlux           | 01/2000-06/2008  | 1.07           | 48.3077  | -105.1019 | 634           | Grassland                                                           | Grasslands       | Eddy covariance       |
| US-FR2  | Mixed Forests          | TX    | AmeriFlux           | 01/2005-12/2007  | 0.78           | 29.9495  | -97.99623 | 271.9         | Mesquite Juniper forest                                             | Mixed Forests    | Eddy covariance       |
| US-Fuf  | Evergreen Forests      | AZ    | AmeriFlux           | 09/2005-12/2010  | 0.96           | 35.089   | -111.762  | 2180          | Ponderosa pine forest,                                              | Evergreen Forest | Eddy covariance       |
| US-Fwf  | Grasslands             | AZ    | AmeriFlux           | 06/2005-12/2010  | 0.97           | 35.4454  | -111.7718 | 2270          | Grassland, after severe fire removed ponderosa 85% Engelmann spruce | Grasslands       | Eddy covariance       |
| US-GLE  | Evergreen Forests      | WY    | AmeriFlux           | 01/1999-03/2018  | 0.73           | 41.3665  | -106.2399 | 3197          | 15% Subalpine fir                                                   | Evergreen Forest | Eddy covariance       |
| US-GMF  | Mixed Forests          | CT    | AmeriFlux           | 05/1999-01/2002  | 0.87           | 41.9667  | -73.23333 | 380           | Hemlock, pine, with mixed deciduous forest                          | Mixed Forests    | Eddy covariance       |
| US-Goo  | Grasslands             | MS    | AmeriFlux           | 05/2002-11/2006  | 0.83           | 34.2547  | -89.8735  | 87            | Grassland                                                           | Grasslands       | Eddy covariance       |
| US-Hn2  | Grasslands             | WA    | AmeriFlux           | 01/2016-12/2018  | 0.85           | 46.6889  | -119.4641 | 117.5         | Cheatgrass and Russian                                              | Grasslands       | Eddy covariance       |
| US-Hn3  | Shrublands             | WA    | AmeriFlux           | 11/2017-12/2018  | 0.87           | 46.6878  | -119.4615 | 120.9         | Cheatgrass, Russian thistle, bitterbrush, sagebrush, and            | Shrublands       | Eddy covariance       |
| US-IB1  | Croplands              | IL    | AmeriFlux           | 07/2005-12/2018  | 0.79           | 41.8593  | -88.22273 | 226.5         | Corn and soybean rotation                                           | Annual crops     | Eddy covariance       |
| US-IB2  | Grasslands             | IL    | AmeriFlux           | 10/2004-12/2018  | 0.78           | 41.8406  | -88.24103 | 226.5         | Restored prairie                                                    | Grasslands       | Eddy covariance       |
| US-Jo2  | Shrublands             | NM    | AmeriFlux           | 08/2010-12/2019  | 0.80           | 32.5849  | -106.6032 | 1469          | Open phreatophyte                                                   | Shrublands       | Eddy covariance       |
| US-KLS  | Croplands              | KS    | AmeriFlux           | 12/2014-12/2016  | 0.78           | 38.7745  | -97.5684  | 373           | Wheatgrass                                                          | Annual crops     | Eddy covariance       |
| US-KM4  | Grasslands             | MI    | AmeriFlux           | 07/2010-12/2018  | 0.78           | 42.4423  | -85.33006 | 288           | Smooth brome grass                                                  | Grasslands       | Eddy covariance       |
| US-KS2  | Shrublands             | FL    | AmeriFlux           | 04/2000-09/2006  | 0.81           | 28.6086  | -80.6715  | 3             | Scrub oak, fire in 1996                                             | Shrublands       | Eddy covariance       |
| US-LS1  | Grasslands             | AZ    | AmeriFlux           | 03/2003-12/2007  | 0.76           | 31.5615  | -110.1403 | 1230          | Bunchgrass                                                          | Grasslands       | Eddy covariance       |
| US-Me1  | Evergreen Forests      | OR    | AmeriFlux           | 06/2004-05/2005  | 0.98           | 44.5794  | -121.5    | 896           | Ponderosa pine forest, burn replaced stand in                       | Evergreen Forest | Eddy covariance       |
| US-Me2  | Evergreen Forests      | OR    | AmeriFlux           | 01/2002-07/2020  | 0.93           | 44.4523  | -121.5574 | 1253          | Mature ponderosa pine                                               | Evergreen Forest | Eddy covariance       |
| US-Me5  | Evergreen Forests      | OR    | AmeriFlux           | 01/2000-12/2002  | 0.76           | 44.4372  | -121.5668 | 1188          | Ponderosa pine forest,                                              | Evergreen Forest | Eddy covariance       |
| US-Me6  | Evergreen Forests      | OR    | AmeriFlux           | 10/2014-07/2020  | 0.83           | 44.3233  | -121.6078 | 998           | Ponderosa pine forest,                                              | Evergreen Forest | Eddy covariance       |
| US-Mj1  | Croplands              | MT    | AmeriFlux           | 04/2013-09/2014  | 0.94           | 46.9948  | -109.6138 | 1285          | Wheat                                                               | Annual crops     | Eddy covariance       |
| US-Mj2  | Croplands              | MT    | AmeriFlux           | 04/2014-09/2014  | 1.03           | 46.9957  | -109.6295 | 1277          | Summer fallow                                                       | Annual crops     | Eddy covariance       |
| US-MMS  | Mixed Forests          | IN    | AmeriFlux           | 01/1999-12/2014  | 0.76           | 39.3232  | -86.4131  | 275           | Mature broadleaf forest, maple, beech, oak, hickory                 | Mixed Forests    | Eddy covariance       |
| US-MOz  | Mixed Forests          | MO    | AmeriFlux           | 05/2006-12/2017  | 0.76           | 38.7441  | -92.2     | 219.4         | Oak/hickory/pine closed forest                                      | Mixed Forests    | Eddy covariance       |
| US-NC2  | Evergreen Forests      | NC    | AmeriFlux           | 01/2005-12/2019  | 1.09           | 35.803   | -76.6685  | 5             | Loblolly pine plantation                                            | Evergreen Forest | Eddy covariance       |
| US-NC3  | Evergreen Forests      | NC    | AmeriFlux           | 03/2013-11/2019  | 1.07           | 35.799   | -76.656   | 5             | Loblolly pine forest, planted after clearcut in 2012                | Evergreen Forest | Eddy covariance       |

| Site ID | General classification | State | Data source/network | Period of record | Energy balance | Latitude | Longitude | Elevation (m) | Land cover details                                                                                                                                                                  | Land cover type   | Measurement technique |
|---------|------------------------|-------|---------------------|------------------|----------------|----------|-----------|---------------|-------------------------------------------------------------------------------------------------------------------------------------------------------------------------------------|-------------------|-----------------------|
| US-NC4  | Wetland/Riparian       | NC    | AmeriFlux           | 02/2009-12/2019  | 1.10           | 35.7879  | -75.9038  | 1             | Forested wetland                                                                                                                                                                    | Wetlands          | Eddy covariance       |
| US-Ne1  | Croplands              | NE    | AmeriFlux           | 06/2001-12/2014  | 0.79           | 41.1651  | -96.47664 | 361           | Agriculture (continuous maize)                                                                                                                                                      | Annual crops      | Eddy covariance       |
| US-Ne2  | Croplands              | NE    | AmeriFlux           | 06/2001-12/2014  | 0.83           | 41.1649  | -96.4701  | 362           | Agriculture (maize-soybean rotation)                                                                                                                                                | Annual crops      | Eddy covariance       |
| US-Ne3  | Croplands              | NE    | AmeriFlux           | 06/2001-12/2014  | 0.87           | 41.1797  | -96.43965 | 363           | Agriculture (maize-soybean rotation)                                                                                                                                                | Annual crops      | Eddy covariance       |
| US-NR1  | Evergreen Forests      | CO    | AmeriFlux           | 06/1999-12/2019  | 0.81           | 40.0329  | -105.5464 | 3050          | Subalpine fir, Engelmann spruce, and lodgepole pine                                                                                                                                 | Evergreen Forests | Eddy covariance       |
| US-Oho  | Mixed Forests          | OH    | AmeriFlux           | 01/2004-12/2013  | 0.82           | 41.5545  | -83.8438  | 230           | Oak woodlands                                                                                                                                                                       | Mixed Forests     | Eddy covariance       |
| US-Ro1  | Croplands              | MN    | AmeriFlux           | 01/2011-12/2016  | 0.78           | 44.7143  | -93.0898  | 260           | Agricultural, corn and soybean rotation                                                                                                                                             | Annual crops      | Eddy covariance       |
| US-Ro2  | Croplands              | MN    | AmeriFlux           | 01/2016-12/2016  | 0.76           | 44.7288  | -93.0888  | 292           | Corn-Soybean-Kura Clover annual rotation                                                                                                                                            | Annual crops      | Eddy covariance       |
| US-Ro3  | Croplands              | MN    | AmeriFlux           | 07/2004-12/2007  | 0.86           | 44.7217  | -93.0893  | 260           | Corn-Soybean annual rotation (corn: 2003, 2005, 2007, 2009, 2011, 2013 soybean: 2004, 2006, 2008, 2010, 2012, 2014)                                                                 | Annual crops      | Eddy covariance       |
| US-Ro4  | Grasslands             | MN    | AmeriFlux           | 09/2015-06/2020  | 0.83           | 44.6781  | -93.0723  | 274           | Restored prairie, Andropogon gerardii, Sorghastrum nutans, and Elymus canadensis                                                                                                    | Grasslands        | Eddy covariance       |
| US-Ro5  | Croplands              | MN    | AmeriFlux           | 03/2017-12/2017  | 0.77           | 44.691   | -93.0576  | 283           | Corn/soy rotation                                                                                                                                                                   | Annual crops      | Eddy covariance       |
| US-Ro6  | Croplands              | MN    | AmeriFlux           | 03/2017-12/2017  | 0.80           | 44.6946  | -93.05776 | 282           | Corn/soybean/clover rotation                                                                                                                                                        | Annual crops      | Eddy covariance       |
| US-Rwe  | Shrublands             | ID    | AmeriFlux           | 01/2003-09/2007  | 0.93           | 43.0653  | -116.7591 | 2098          | Mixed sagebrush                                                                                                                                                                     | Shrublands        | Eddy covariance       |
| US-Rwf  | Shrublands             | ID    | AmeriFlux           | 06/2014-01/2018  | 0.85           | 43.1207  | -116.7231 | 1878          | Sagebrush, prescribed fire in 2007                                                                                                                                                  | Shrublands        | Eddy covariance       |
| US-Rws  | Shrublands             | ID    | AmeriFlux           | 09/2014-09/2018  | 0.87           | 43.1675  | -116.7132 | 1425          | The site is a grazing allotment with light cattle grazing in spring.                                                                                                                | Shrublands        | Eddy covariance       |
| US-SCg  | Grasslands             | CA    | AmeriFlux           | 08/2008-04/2011  | 0.89           | 33.7365  | -117.6946 | 465           | Grassland                                                                                                                                                                           | Grasslands        | Eddy covariance       |
| US-SCs  | Shrublands             | CA    | AmeriFlux           | 08/2008-10/2014  | 0.81           | 33.7343  | -117.696  | 470           | Coastal sage scrub                                                                                                                                                                  | Shrublands        | Eddy covariance       |
| US-SCw  | Shrublands             | CA    | AmeriFlux           | 09/2008-12/2009  | 0.88           | 33.6047  | -116.4527 | 1281          | Pinyon/Juniper woodland                                                                                                                                                             | Shrublands        | Eddy covariance       |
| US-SdH  | Grasslands             | NE    | AmeriFlux           | 05/2004-12/2009  | 1.04           | 42.0693  | -101.4072 | 1081          | Grass pasture                                                                                                                                                                       | Grasslands        | Eddy covariance       |
| US-Skr  | Wetland/Riparian       | FL    | AmeriFlux           | 01/2004-08/2011  | 0.93           | 25.3629  | -81.07758 | 0             | This is a tall (up to 20 m) mangrove forest.                                                                                                                                        | Wetlands          | Eddy covariance       |
| US-Slt  | Mixed Forests          | NJ    | AmeriFlux           | 01/2005-12/2014  | 1.08           | 39.9138  | -74.596   | 30            | Oak forest                                                                                                                                                                          | Mixed Forests     | Eddy covariance       |
| US-Sne  | Wetland/Riparian       | CA    | AmeriFlux           | 05/2016-12/2019  | 0.85           | 38.0369  | -121.7547 | -5            | Restored wetland                                                                                                                                                                    | Wetlands          | Eddy covariance       |
| US-SO2  | Shrublands             | CA    | AmeriFlux           | 03/1997-12/2006  | 0.99           | 33.3738  | -116.6228 | 1394          | Chaparral, severe fire in 2003                                                                                                                                                      | Shrublands        | Eddy covariance       |
| US-SO3  | Shrublands             | CA    | AmeriFlux           | 03/1997-12/2006  | 0.90           | 33.3771  | -116.6226 | 1429          | Chaparral, severe fire in 2003                                                                                                                                                      | Shrublands        | Eddy covariance       |
| US-SO4  | Shrublands             | CA    | AmeriFlux           | 01/2004-12/2006  | 0.87           | 33.3845  | -116.6406 | 1429          | Old-growth chaparral ecosystem                                                                                                                                                      | Shrublands        | Eddy covariance       |
| US-SP2  | Evergreen Forests      | FL    | AmeriFlux           | 02/1999-07/2008  | 0.89           | 29.7648  | -82.24482 | 50            | Slash pine (Pinus elliottii) plantation, planted in Jan. 1999                                                                                                                       | Evergreen Forests | Eddy covariance       |
| US-SP3  | Evergreen Forests      | FL    | AmeriFlux           | 01/1999-12/2010  | 0.85           | 29.7548  | -82.16328 | 50            | Even aged high density slash pine (Pinus elliottii) plantation.                                                                                                                     | Evergreen Forests | Eddy covariance       |
| US-SRC  | Mixed Forests          | AZ    | AmeriFlux           | 03/2008-06/2014  | 0.82           | 31.9083  | -110.8395 | 950           | Greasewood                                                                                                                                                                          | Mixed Forests     | Eddy covariance       |
| US-SRG  | Grasslands             | AZ    | AmeriFlux           | 04/2008-06/2020  | 0.91           | 31.7894  | -110.8277 | 1291          | C4 grassland pasture                                                                                                                                                                | Grasslands        | Eddy covariance       |
| US-SRM  | Shrublands             | AZ    | AmeriFlux           | 01/2004-06/2020  | 0.89           | 31.8214  | -110.8661 | 1120          | MODIS website lists this as Open Shrublands (OSO), but site is a Desert Grassland that has been fully encroached by Mesquite (now about 35% canopy cover, mean canopy height > 2 m) | Shrublands        | Eddy covariance       |
| US-Srr  | Wetland/Riparian       | CA    | AmeriFlux           | 03/2016-10/2017  | 0.86           | 38.2006  | -122.0264 | 8             | Brackish tidal marsh                                                                                                                                                                | Wetlands          | Eddy covariance       |
| US-SRS  | Shrublands             | AZ    | AmeriFlux           | 05/2011-11/2018  | 0.94           | 31.8173  | -110.8508 | 1169          | Mesquite savanna, herbicide applied in 2016                                                                                                                                         | Shrublands        | Eddy covariance       |
| US-Tw2  | Croplands              | CA    | AmeriFlux           | 05/2012-04/2013  | 0.77           | 38.1047  | -121.6433 | -5            | Corn on peat soil                                                                                                                                                                   | Annual crops      | Eddy covariance       |
| US-Tw3  | Croplands              | CA    | AmeriFlux           | 05/2013-06/2018  | 0.85           | 38.1159  | -121.6467 | -9            | Alfalfa                                                                                                                                                                             | Annual crops      | Eddy covariance       |
| US-Twt  | Croplands              | CA    | AmeriFlux           | 04/2009-04/2017  | 0.90           | 38.1087  | -121.6531 | -7            | Rice                                                                                                                                                                                | Annual crops      | Eddy covariance       |
| US-Var  | Grasslands             | CA    | AmeriFlux           | 10/2000-08/2020  | 0.94           | 38.4133  | -120.9507 | 129           | Annual grasses and forbs                                                                                                                                                            | Grasslands        | Eddy covariance       |
| US-WBW  | Mixed Forests          | TN    | AmeriFlux           | 01/1995-06/2007  | 0.75           | 35.9588  | -84.28743 | 283           | Oak/hickory broadleaf forest                                                                                                                                                        | Mixed Forests     | Eddy covariance       |
| US-WCr  | Mixed Forests          | WI    | AmeriFlux           | 02/1999-04/2020  | 0.89           | 45.8059  | -90.0799  | 520           | sugar maple (Acer saccharum), basswood (Tilia americana), and yellow birch (Betula alleghaniensis).                                                                                 | Mixed Forests     | Eddy covariance       |
| US-Wkg  | Grasslands             | AZ    | AmeriFlux           | 05/2004-06/2020  | 0.93           | 31.7365  | -109.9419 | 1531          | Desert grassland                                                                                                                                                                    | Grasslands        | Eddy covariance       |
| US-xAE  | Grasslands             | OK    | AmeriFlux           | 02/2018-05/2020  | 0.76           | 35.4106  | -99.05879 | 516           | Grass pasture                                                                                                                                                                       | Grasslands        | Eddy covariance       |
| US-xDC  | Grasslands             | ND    | AmeriFlux           | 10/2017-05/2020  | 0.74           | 47.1617  | -99.10656 | 559           | Prairie grasslands, mid- to tall-height                                                                                                                                             | Grasslands        | Eddy covariance       |
| US-xDL  | Mixed Forests          | AL    | AmeriFlux           | 01/2017-05/2020  | 0.83           | 32.5417  | -87.80389 | 22            | Oak and hickory                                                                                                                                                                     | Mixed Forests     | Eddy covariance       |
| US-xDS  | Grasslands             | FL    | AmeriFlux           | 01/2018-05/2020  | 0.75           | 28.125   | -81.4362  | 15            | Native grasses and wetlands                                                                                                                                                         | Grasslands        | Eddy covariance       |

| Site ID       | General classification | State | Data source/network | Period of record | Energy balance | Latitude | Longitude | Elevation (m) | Land cover details                                                            | Land cover type   | Measurement technique |
|---------------|------------------------|-------|---------------------|------------------|----------------|----------|-----------|---------------|-------------------------------------------------------------------------------|-------------------|-----------------------|
| US-xNG        | Grasslands             | ND    | AmeriFlux           | 10/2017-04/2020  | 0.71           | 46.7697  | -100.9154 | 578           | Smooth Brome and Kentucky blue grass grassland                                | Grasslands        | Eddy covariance       |
| US-xRM        | Evergreen Forests      | CO    | AmeriFlux           | 06/2017-05/2020  | 0.65           | 40.2759  | -105.5459 | 2743          | Ponderosa pine, open canopy                                                   | Evergreen Forests | Eddy covariance       |
| US-xSB        | Evergreen Forests      | FL    | AmeriFlux           | 12/2017-05/2020  | 0.82           | 29.6893  | -81.99343 | 45            | Pine forest, longleaf and loblolly                                            | Evergreen Forests | Eddy covariance       |
| US-xSL        | Croplands              | CO    | AmeriFlux           | 06/2017-05/2020  | 0.78           | 40.4619  | -103.0293 | 1364          | Winter wheat, millet, and maize, no-till                                      | Annual crops      | Eddy covariance       |
| US-xST        | Mixed Forests          | WI    | AmeriFlux           | 08/2018-05/2020  | 0.77           | 45.5089  | -89.58637 | 481           | Early successional, even-aged aspen stand, with some red maple and balsam fir | Mixed Forests     | Eddy covariance       |
| US-xUN        | Mixed Forests          | MI    | AmeriFlux           | 08/2017-05/2020  | 0.74           | 46.2339  | -89.53725 | 518           | Maple, aspen, birch mesic forest                                              | Mixed Forests     | Eddy covariance       |
| MB_Pch        | Croplands              | CA    | CSUMB               | 04/2012-12/2015  | 1.00           | 36.4587  | -119.5801 | 90            | Peach                                                                         | Orchards          | Eddy covariance       |
| Ellendale     | Croplands              | LA    | Delta-Flux          | 8/2018-12/2020   | 0.77           | 29.6333  | -90.82766 | 2             | Sugarcane                                                                     | Annual crops      | Eddy covariance       |
| manilacotton  | Croplands              | AR    | Delta-Flux          | 5/2016-10/2018   | 0.80           | 35.8872  | -90.1371  | 73            | Cotton                                                                        | Annual crops      | Eddy covariance       |
| stonevillesoy | Croplands              | MS    | Delta-Flux          | 04/2017-07/2019  | 0.81           | 33.4433  | -90.8865  | 37            | Soy                                                                           | Annual crops      | Eddy covariance       |
| US-OF1        | Croplands              | AR    | Delta-Flux          | 5/2017-9/2017    | 0.84           | 35.7371  | -90.0492  | 70            | Rice                                                                          | Annual crops      | Eddy covariance       |
| US-OF2        | Croplands              | AR    | Delta-Flux          | 6/2017-9/2017    | 0.76           | 35.7406  | -90.0489  | 70            | Rice                                                                          | Annual crops      | Eddy covariance       |
| US-OF4        | Croplands              | AR    | Delta-Flux          | 5/2018-8/2018    | 0.89           | 35.7343  | -90.03798 | 71            | Rice                                                                          | Annual crops      | Eddy covariance       |
| US-OF6        | Croplands              | AR    | Delta-Flux          | 5/2018-8/2018    | 0.78           | 35.73    | -90.04033 | 70            | Rice                                                                          | Annual crops      | Eddy covariance       |
| S2            | Croplands              | OR    | DRI                 | 09/2017-04/2021  | 0.80           | 43.4171  | -118.6142 | 1255          | Alfalfa                                                                       | Annual crops      | Eddy covariance       |
| ALARC2_Smith6 | Croplands              | AZ    | USDA-ARS            | 01/2018-06/2018  | 0.84           | 32.6973  | -114.5154 | 45            | Wheat                                                                         | Annual crops      | Eddy covariance       |
| Almond_High   | Croplands              | CA    | USDA-ARS            | 10/2016-10/2019  | 0.83           | 36.1697  | -120.201  | 147           | Almond                                                                        | Orchards          | Eddy covariance       |
| Almond_Low    | Croplands              | CA    | USDA-ARS            | 10/2016-10/2019  | 0.84           | 36.9466  | -120.1024 | 78            | Almond                                                                        | Orchards          | Eddy covariance       |
| Almond_Med    | Croplands              | CA    | USDA-ARS            | 09/2016-10/2019  | 0.82           | 36.1777  | -120.2026 | 147           | Almond                                                                        | Orchards          | Eddy covariance       |
| JPL1_JV114    | Croplands              | AZ    | USDA-ARS            | 09/2018-12/2018  | 0.77           | 32.6563  | -114.6565 | 35            | Iceberg                                                                       | Vegetable crops   | Eddy covariance       |
| JPL1_Smith5   | Croplands              | AZ    | USDA-ARS            | 12/2017-06/2018  | 0.78           | 32.6975  | -114.5195 | 44            | Wheat                                                                         | Annual crops      | Eddy covariance       |
| UA1_HartFarm  | Croplands              | AZ    | USDA-ARS            | 12/2018-05/2019  | 0.92           | 33.0774  | -112.1121 | 355           | Wheat                                                                         | Annual crops      | Eddy covariance       |
| UA1_JV187     | Croplands              | AZ    | USDA-ARS            | 03/2018-07/2018  | 0.87           | 32.7065  | -114.7085 | 36            | Sudan                                                                         | Annual crops      | Eddy covariance       |
| UA1_KN18      | Croplands              | AZ    | USDA-ARS            | 09/2018-11/2018  | 0.94           | 32.7762  | -114.5888 | 40            | Cauliflower                                                                   | Vegetable crops   | Eddy covariance       |
| UA2_JV330     | Croplands              | AZ    | USDA-ARS            | 11/2018-01/2019  | 0.89           | 32.7122  | -114.5742 | 40            | Spring mix                                                                    | Vegetable crops   | Eddy covariance       |
| UA2_KN20      | Croplands              | AZ    | USDA-ARS            | 02/2019-03/2019  | 0.87           | 32.7795  | -114.5811 | 40            | Baby Leaf Lettuce                                                             | Vegetable crops   | Eddy covariance       |
| UA3_JV108     | Croplands              | AZ    | USDA-ARS            | 03/2018-06/2018  | 0.87           | 32.7207  | -114.706  | 37            | Sudan                                                                         | Annual crops      | Eddy covariance       |
| UA3_KN15      | Croplands              | AZ    | USDA-ARS            | 09/2018-11/2018  | 0.88           | 32.7802  | -114.5883 | 39            | Broccoli                                                                      | Vegetable crops   | Eddy covariance       |
| LYS_NE        | Croplands              | TX    | USDA-ARS            | 5/2013-10/2016   |                | 35.1881  | -102.0955 | 1173          | Corn and sorghum, subsurface drip irrigation                                  | Annual crops      | Weighing lysimeter    |
| LYS_NW        | Croplands              | TX    | USDA-ARS            | 6/2013-10/2016   |                | 35.1881  | -102.0979 | 1174          | Corn and sorghum, mid elevation sprinkler application                         | Annual crops      | Weighing lysimeter    |
| LYS_SE        | Croplands              | TX    | USDA-ARS            | 5/2013-10/2016   |                | 35.1861  | -102.0956 | 1172          | Corn and sorghum, subsurface drip irrigation                                  | Annual crops      | Weighing lysimeter    |
| LYS_SW        | Croplands              | TX    | USDA-ARS            | 6/2013-10/2016   |                | 35.1861  | -102.0979 | 1174          | Corn and sorghum, mid elevation sprinkler application                         | Annual crops      | Weighing lysimeter    |
| BAR012        | Croplands              | CA    | USDA-ARS GRAPEX     | 05/2017-11/2018  | 0.85           | 38.751   | -122.975  | 102           | Vineyard                                                                      | Vineyards         | Eddy covariance       |
| RIP760        | Croplands              | CA    | USDA-ARS GRAPEX     | 05/2017-11/2018  | 0.88           | 36.839   | -120.21   | 57            | Vineyard                                                                      | Vineyards         | Eddy covariance       |
| SLM001        | Croplands              | CA    | USDA-ARS GRAPEX     | 01/2017-11/2018  | 0.94           | 38.289   | -121.118  | 39            | Vineyard                                                                      | Vineyards         | Eddy covariance       |
| B_01          | Croplands              | NV    | USGS NWSC           | 03/2005-04/2007  |                | 39.055   | -119.134  | 1326          | Non Irrigated Alfalfa                                                         | Annual crops      | Bowen Ratio           |
| B_11          | Croplands              | NV    | USGS NWSC           | 03/2005-03/2007  |                | 39.108   | -119.146  | 1317          | Irrigated Alfalfa                                                             | Annual crops      | Bowen Ratio           |
| ET_1          | Shrublands             | NV    | USGS NWSC           | 01/2004-10/2004  |                | 39.029   | -119.808  | 1420          | Greasewood/Rabbitbrush                                                        | Shrublands        | Bowen Ratio           |
| ET_8          | Croplands              | NV    | USGS NWSC           | 06/2003-11/2004  |                | 38.859   | -119.764  | 1471          | Irrigated Pasture Grass                                                       | Annual crops      | Bowen Ratio           |
| MR            | Wetland/Riparian       | NV    | USGS NWSC           | 07/2003-09/2006  |                | 36.691   | -114.688  | 503           | Mesquite                                                                      | Riparian          | Bowen Ratio           |
| TAM           | Wetland/Riparian       | NV    | USGS NWSC           | 03/2005-03/2007  |                | 38.851   | -118.773  | 1222          | Salt Cedar                                                                    | Riparian          | Bowen Ratio           |
| VR            | Wetland/Riparian       | NV    | USGS NWSC           | 02/2003-03/2005  |                | 36.588   | -114.328  | 370           | Salt Cedar                                                                    | Riparian          | Bowen Ratio           |
| AFD           | Shrublands             | NV    | USGS NWSC           | 11/2011-11/2013  | 0.83           | 36.4909  | -116.2533 | 709           | Shadscale                                                                     | Shrublands        | Eddy covariance       |
| AFS           | Grasslands             | NV    | USGS NWSC           | 11/2011-11/2013  | 0.99           | 36.4926  | -116.2594 | 708           | Salt Grass                                                                    | Grasslands        | Eddy covariance       |
| BPHV          | Grasslands             | CA    | USGS NWSC           | 10/2012-09/2013  | 0.77           | 38.2097  | -119.2914 | 1997          | Pasture Grass                                                                 | Grasslands        | Eddy covariance       |
| BPLV          | Grasslands             | CA    | USGS NWSC           | 10/2012-09/2013  | 0.98           | 38.2267  | -119.2861 | 2023          | Pasture grass                                                                 | Grasslands        | Eddy covariance       |
| DVDV          | Shrublands             | NV    | USGS NWSC           | 10/2009-09/2011  | 0.77           | 39.7625  | -117.9601 | 1046          | Greasewood/Big Saltbush/Seepweed                                              | Shrublands        | Eddy covariance       |
| KV_1          | Shrublands             | NV    | USGS NWSC           | 08/2011-08/2012  | 0.89           | 39.5371  | -116.3576 | 1859          | Greasewood/Rabbitbrush                                                        | Shrublands        | Eddy covariance       |
| KV_2          | Shrublands             | NV    | USGS NWSC           | 08/2010-08/2012  | 0.91           | 39.6197  | -116.2134 | 1845          | Greasewood/Rabbitbrush/Salt Grass                                             | Shrublands        | Eddy covariance       |
| KV_4          | Grasslands             | NV    | USGS NWSC           | 11/2011-11/2012  | 0.90           | 39.5987  | -116.1642 | 1833          | Meadow Grass                                                                  | Grasslands        | Eddy covariance       |
| SPV_1         | Shrublands             | NV    | USGS NWSC           | 09/2005-08/2007  | 0.81           | 38.7776  | -114.4678 | 1763          | Greasewood/Rabbitbrush                                                        | Shrublands        | Eddy covariance       |
| SPV_3         | Grasslands             | NV    | USGS NWSC           | 09/2005-08/2007  | 0.93           | 38.9367  | -114.4212 | 1763          | Mixed Grasses                                                                 | Grasslands        | Eddy covariance       |
| SV_5          | Shrublands             | NV    | USGS NWSC           | 10/2007-09/2009  | 0.95           | 39.0325  | -114.4855 | 1760          | Greasewood/Rabbitbrush                                                        | Shrublands        | Eddy covariance       |
| SV_6          | Shrublands             | NV    | USGS NWSC           | 10/2007-09/2009  | 0.95           | 39.0429  | -114.4831 | 1756          | Greasewood/Rabbitbrush                                                        | Shrublands        | Eddy covariance       |
| UMVW          | Shrublands             | NV    | USGS NWSC           | 10/2005-09/2006  | 1.06           | 37.5204  | -114.5832 | 1250          | Rabbitbrush                                                                   | Shrublands        | Eddy covariance       |
| WRV_1         | Shrublands             | NV    | USGS NWSC           | 09/2005-08/2007  | 0.99           | 38.4136  | -115.0509 | 1600          | Greasewood                                                                    | Shrublands        | Eddy covariance       |
| WRV_2         | Shrublands             | NV    | USGS NWSC           | 09/2006-08/2007  | 0.82           | 38.6405  | -115.1026 | 1622          | Greasewood                                                                    | Shrublands        | Eddy covariance       |

| Site ID | DOI/link             | Team member          | Member role | Member institution                                      | Member email                | Site name                                                          |
|---------|----------------------|----------------------|-------------|---------------------------------------------------------|-----------------------------|--------------------------------------------------------------------|
| US-A32  | 10.17190/AMF/1436327 | Lara Kueppers        | PI          | Lawrence Berkeley National Laboratory                   | lmkueppers@lbl.gov          | ARM-SGP Medford hay pasture                                        |
| US-A74  | 10.17190/AMF/1436328 | Lara Kueppers        | PI          | Lawrence Berkeley National Laboratory                   | lmkueppers@lbl.gov          | ARM SGP milo field                                                 |
| US-ADR  | 10.17190/AMF/1418680 | Michael Moreo        | PI          | U.S. Geological Survey                                  | mtmoreo@usgs.gov            | Amargosa Desert Research Site (ADRS)                               |
| US-AR1  | 10.17190/AMF/1246137 | Dave Billesbach      | PI          | University of Nebraska                                  | dbillesbach1@unl.edu        | ARM USDA UNL OSU Woodward Switchgrass 1                            |
| US-ARb  | 10.17190/AMF/1246025 | Margaret Torn        | PI          | Lawrence Berkeley National Laboratory                   | mstorn@lbl.gov              | ARM Southern Great Plains burn site- Lamont                        |
| US-ARc  | 10.17190/AMF/1246026 | Margaret Torn        | PI          | Lawrence Berkeley National Laboratory                   | mstorn@lbl.gov              | ARM Southern Great Plains control site- Lamont                     |
| US-ARM  | 10.17190/AMF/1246027 | Sebastien Biraud     | PI          | Lawrence Berkeley National Laboratory                   | SCBiraud@lbl.gov            | ARM Southern Great Plains site- Lamont                             |
| US-Aud  | 10.17190/AMF/1246028 | Tilden Meyers        | PI          | NOAA/ARL                                                | Tilden.Meyers@noaa.gov      | Audubon Research Ranch                                             |
| US-Bi1  | 10.17190/AMF/1480317 | Dennis Baldocchi     | PI          | University of California, Berkeley                      | Baldocchi@berkeley.edu      | Bouldin Island Alfalfa                                             |
| US-Bi2  | 10.17190/AMF/1419513 | Dennis Baldocchi     | PI          | University of California, Berkeley                      | baldocchi@berkeley.edu      | Bouldin Island corn                                                |
| US-Bkg  | 10.17190/AMF/1246040 | Tilden Meyers        | PI          | NOAA/ARL                                                | Tilden.Meyers@noaa.gov      | Brookings                                                          |
| US-Blk  | 10.17190/AMF/1246031 | Tilden Meyers        | PI          | NOAA/ARL                                                | Tilden.Meyers@noaa.gov      | Black Hills                                                        |
| US-Blo  | 10.17190/AMF/1246032 | Allen Goldstein      | PI          | University of California, Berkeley                      | ahg@berkeley.edu            | Blodgett Forest                                                    |
| US-Bo1  | 10.17190/AMF/1246036 | Tilden Meyers        | PI          | NOAA/ARL                                                | Tilden.Meyers@noaa.gov      | Bondville                                                          |
| US-Br1  | 10.17190/AMF/1246038 | John Prueger         | PI          | National Laboratory for Agriculture and the Environment | john.prueger@ars.usda.gov   | Brooks Field Site 10- Ames                                         |
| US-Br3  | 10.17190/AMF/1246039 | John Prueger         | PI          | National Laboratory for Agriculture and the Environment | john.prueger@ars.usda.gov   | Brooks Field Site 11- Ames                                         |
| US-Ced  | 10.17190/AMF/1246043 | Ken Clark            | PI          | USDA Forest Service                                     | kennethclark@fs.fed.us      | Cedar Bridge                                                       |
| US-CMW  | 10.17190/AMF/1660339 | Russell Scott        | PI          | USDA-ARS                                                | russ.scott@ars.usda.gov     | Charleston Mesquite Woodland                                       |
| US-CRT  | 10.17190/AMF/1246156 | Jiquan Chen          | PI          | University of Toledo / Michigan State University        | jqchen@msu.edu              | Curtice Walter-Berger cropland                                     |
| US-Ctn  | 10.17190/AMF/1246117 | Tilden Meyers        | PI          | NOAA/ARL                                                | tilden.meyers@noaa.gov      | Cottonwood                                                         |
| US-CZ3  | 10.17190/AMF/1419512 | Michael Goulden      | PI          | UC Irvine                                               | mgoulden@uci.edu            | Sierra Critical Zone, Sierra Transect, Sierran Mixed Conifer, P301 |
| US-Dix  | 10.17190/AMF/1246045 | Ken Clark            | PI          | USDA Forest Service                                     | kennethclark@fs.fed.us      | Fort Dix                                                           |
| US-Dk1  | 10.17190/AMF/1246046 | Chris Oishi          | PI          | USDA Forest Service                                     | christopher.oishi@gmail.com | Duke Forest-open field                                             |
| US-Dk2  | 10.17190/AMF/1246047 | A. Christopher Oishi | PI          | USDA Forest Service                                     | acoishi@fs.fed.us           | Duke Forest-hardwoods                                              |
| US-Esm  | 10.17190/AMF/1246119 | Gregory Starr        | PI          | University of Alabama                                   | gstarr@bama.ua.edu          | Everglades (short hydroperiod marsh)                               |
| US-Fmf  | 10.17190/AMF/1246050 | Sabina Dore          | PI          | Northern Arizona University                             | Sabina.Dore@nau.edu         | Flagstaff - Managed Forest                                         |
| US-FPe  | 10.17190/AMF/1246053 | Tilden Meyers        | PI          | NOAA/ARL                                                | Tilden.Meyers@noaa.gov      | Fort Peck                                                          |
| US-FR2  | 10.17190/AMF/1246054 | Marcy Litvak         | PI          | University of New Mexico                                | mlitvak@unm.edu             | Freeman Ranch- Mesquite Juniper                                    |
| US-Fuf  | 10.17190/AMF/1246051 | Sabina Dore          | PI          | Northern Arizona University                             | Sabina.Dore@nau.edu         | Flagstaff - Unmanaged Forest                                       |
| US-Fwf  | 10.17190/AMF/1246052 | Sabina Dore          | PI          | Northern Arizona University                             | Sabina.Dore@nau.edu         | Flagstaff - Wildfire                                               |
| US-GLE  | 10.17190/AMF/1246056 | Bill Massman         | PI          | USDA Forest Service                                     | wmassman@fs.fed.us          | GLEES                                                              |
| US-GMF  | 10.17190/AMF/1246057 | Xuhui Lee            | PI          | Yale University                                         | xuhui.lee@yale.edu          | Great Mountain Forest                                              |
| US-Goo  | 10.17190/AMF/1246058 | Tilden Meyers        | PI          | NOAA/ARL                                                | Tilden.Meyers@noaa.gov      | Goodwin Creek                                                      |
| US-Hn2  | 10.17190/AMF/1562389 | Heping Liu           | PI          | Washington State University                             | heping.liu@wsu.edu          | Hanford 100H grassland                                             |
| US-Hn3  | 10.17190/AMF/1543379 | Heping Liu           | PI          | Washington State University                             | heping.liu@wsu.edu          | Hanford 100H sagebrush                                             |
| US-IB1  | 10.17190/AMF/1246065 | Roser Matamala       | PI          | Argonne National Laboratory                             | matamala@anl.gov            | Fermi National Accelerator Laboratory- Batavia (Agricultural site) |
| US-IB2  | 10.17190/AMF/1246066 | Roser Matamala       | PI          | Argonne National Laboratory                             | matamala@anl.gov            | Fermi National Accelerator Laboratory- Batavia (Prairie site)      |
| US-Jo2  | 10.17190/AMF/1617696 | Enrique R. Vivoni    | PI          | Arizona State University                                | vivoni@asu.edu              | Jornada Experimental Range Mixed Shrubland                         |
| US-KLS  | 10.17190/AMF/1498745 | Nathaniel Brunsell   | PI          | Kansas University                                       | brunsell@ku.edu             | Kansas Land Institute                                              |
| US-KM4  | 10.17190/AMF/1634882 | G. Philip Robertson  | PI          | Michigan State University                               | robert30@msu.edu            | KBS Marshall Farms Smooth Brome Grass (Ref)                        |
| US-KS2  | 10.17190/AMF/1246070 | Bert Drake           | PI          | Smithsonian Environmental Research Center               | drakeb@si.edu               | Kennedy Space Center (scrub oak)                                   |
| US-LS1  | 10.17190/AMF/1660346 | Russell Scott        | PI          | USDA-ARS                                                | russ.scott@ars.usda.gov     | San Pedro River Lewis Springs Sacaton Grassland                    |
| US-Me1  | 10.17190/AMF/1246074 | Bev Law              | PI          | Oregon State University                                 | bev.law@oregonstate.edu     | Metolius - Eyerly burn                                             |
| US-Me2  | 10.17190/AMF/1246076 | Bev Law              | PI          | Oregon State University                                 | bev.law@oregonstate.edu     | Metolius mature ponderosa pine                                     |
| US-Me5  | 10.17190/AMF/1246079 | Bev Law              | PI          | Oregon State University                                 | bev.law@oregonstate.edu     | Metolius-first young aged pine                                     |
| US-Me6  | 10.17190/AMF/1246128 | Bev Law              | PI          | Oregon State University                                 | bev.law@oregonstate.edu     | Metolius Young Pine Burn                                           |

| Site ID | DOI/link             | Team member        | Member role | Member institution                               | Member email                    | Site name                                                      |
|---------|----------------------|--------------------|-------------|--------------------------------------------------|---------------------------------|----------------------------------------------------------------|
| US-Mj1  | 10.17190/AMF/1617715 | Paul C. Stoy       | PI          | Montana State University                         | paul.stoy@montana.edu           | Montana Judith Basin wheat field                               |
| US-Mj2  | 10.17190/AMF/1617716 | Paul C. Stoy       | PI          | Montana State University                         | paul.stoy@montana.edu           | Montana Judith Basin summer fallow field                       |
| US-MMS  | 10.17190/AMF/1246080 | Kim Novick         | PI          | Indiana University                               | knovick@indiana.edu             | Morgan Monroe State Forest                                     |
| US-MOz  | 10.17190/AMF/1246081 | Jeffrey Wood       | PI          | University of Missouri                           | woodjd@missouri.edu             | Missouri Ozark Site                                            |
| US-NC2  | 10.17190/AMF/1246083 | Asko Noormets      | PI          | Texas A&M University                             | noormets@tamu.edu               | NC_Lobolly Plantation                                          |
| US-NC3  | 10.17190/AMF/1419506 | Asko Noormets      | PI          | Texas A&M University                             | noormets@tamu.edu               | NC_Clearcut#3                                                  |
| US-NC4  | 10.17190/AMF/1480314 | Asko Noormets      | PI          | Texas A&M University                             | noormets@tamu.edu               | NC_AlligatorRiver                                              |
| US-Ne1  | 10.17190/AMF/1246084 | Andy Suyker        | PI          | University of Nebraska - Lincoln                 | asuyker1@unl.edu                | Mead - irrigated continuous maize site                         |
| US-Ne2  | 10.17190/AMF/1246085 | Andy Suyker        | PI          | University of Nebraska - Lincoln                 | asuyker1@unl.edu                | Mead - irrigated maize-soybean rotation site                   |
| US-Ne3  | 10.17190/AMF/1246086 | Andy Suyker        | PI          | University of Nebraska - Lincoln                 | asuyker1@unl.edu                | Mead - rainfed maize-soybean rotation site                     |
| US-NR1  | 10.17190/AMF/1246088 | Peter Blanken      | PI          | University of Colorado                           | Blanken@Colorado.EDU            | Niwot Ridge Forest (LTER NWT1)                                 |
| US-Oho  | 10.17190/AMF/1246089 | Jiquan Chen        | PI          | University of Toledo / Michigan State University | jqchen@msu.edu                  | Oak Openings                                                   |
| US-Ro1  | 10.17190/AMF/1246092 | John Baker         | PI          | USDA-ARS                                         | john.baker@ars.usda.gov         | Rosemount- G21                                                 |
| US-Ro2  | 10.17190/AMF/1418683 | John Baker         | PI          | USDA-ARS                                         | john.baker@ars.usda.gov         | Rosemount- C7                                                  |
| US-Ro3  | 10.17190/AMF/1246093 | John Baker         | PI          | USDA-ARS                                         | John.Baker@ARS.USDA.GOV         | Rosemount- G19                                                 |
| US-Ro4  | 10.17190/AMF/1419507 | John Baker         | PI          | USDA-ARS                                         | John.Baker@ARS.USDA.GOV         | Rosemount Prairie                                              |
| US-Ro5  | 10.17190/AMF/1419508 | John Baker         | PI          | USDA-ARS                                         | john.baker@ars.usda.gov         | Rosemount I18_South                                            |
| US-Ro6  | 10.17190/AMF/1419509 | John Baker         | PI          | USDA-ARS                                         | john.baker@ars.usda.gov         | Rosemount I18_North                                            |
| US-Rwe  | 10.17190/AMF/1617721 | Gerald Flerchinger | PI          | USDA Agricultural Research Service               | gerald.flerchinger@ars.usda.gov | RCEW Reynolds Mountain East                                    |
| US-Rwf  | 10.17190/AMF/1617724 | Gerald Flerchinger | PI          | USDA Agricultural Research Service               | gerald.flerchinger@ars.usda.gov | RCEW Upper Sheep Prescribed Fire                               |
| US-Rws  | 10.17190/AMF/1375201 | Gerald Flerchinger | PI          | USDA Agricultural Research Service               | gerald.flerchinger@ars.usda.gov | Reynolds Creek Wyoming big sagebrush                           |
| US-SCg  | 10.17190/AMF/1419502 | Mike Goulden       | PI          | University of California - Irvine                | mgoulden@uci.edu                | Southern California Climate Gradient - Grassland               |
| US-SCs  | 10.17190/AMF/1419501 | Mike Goulden       | PI          | University of California - Irvine                | mgoulden@uci.edu                | Southern California Climate Gradient - Coastal Sage            |
| US-SCw  | 10.17190/AMF/1419504 | Mike Goulden       | PI          | University of California - Irvine                | mgoulden@uci.edu                | Southern California Climate Gradient - Pinyon/Juniper Woodland |
| US-SdH  | 10.17190/AMF/1246136 | Dave Billesbach    | PI          | University of Nebraska                           | dbillesbach1@unl.edu            | Nebraska SandHills Dry Valley                                  |
| US-Skr  | 10.17190/AMF/1246105 | Sparkle Malone     | PI          | Pennsylvania State University                    | jdfuentes@psu.edu               | Shark River Slough (Tower SRS-6) Everglades                    |
| US-Slt  | 10.17190/AMF/1246096 | Ken Clark          | PI          | USDA Forest Service                              | kennethclark@fs.fed.us          | Silas Little - New Jersey                                      |
| US-Sne  | 10.17190/AMF/1418684 | Dennis Baldocchi   | PI          | University of California, Berkeley               | Baldocchi@berkeley.edu          | Sherman Island Restored Wetland                                |
| US-SO2  | 10.17190/AMF/1246097 | Walt Oechel        | PI          | San Diego State University                       | woechel@mail.sdsu.edu           | Sky Oaks- Old Stand                                            |
| US-SO3  | 10.17190/AMF/1246098 | Walt Oechel        | PI          | San Diego State University                       | woechel@mail.sdsu.edu           | Sky Oaks- Young Stand                                          |
| US-SO4  | 10.17190/AMF/1246099 | Walt Oechel        | PI          | San Diego State University                       | woechel@mail.sdsu.edu           | Sky Oaks- New Stand                                            |
| US-SP2  | 10.17190/AMF/1246101 | Tim Martin         | PI          | University of Florida                            | tamartin@ufl.edu                | Slashpine-Mize-clearcut-3yr,regen                              |
| US-SP3  | 10.17190/AMF/1246102 | Tim Martin         | PI          | University of Florida                            | tamartin@ufl.edu                | Slashpine-Donaldson-mid-rot- 12yrs                             |
| US-SRC  | 10.17190/AMF/1246127 | Shirley Kurc       | PI          | University of Arizona                            | kurc@ag.arizona.edu             | Santa Rita Creosote                                            |
| US-SRG  | 10.17190/AMF/1246154 | Russell Scott      | PI          | United States Department of Agriculture          | russ.scott@ars.usda.gov         | Santa Rita Grassland                                           |
| US-SRM  | 10.17190/AMF/1246104 | Russell Scott      | PI          | United States Department of Agriculture          | russ.scott@ars.usda.gov         | Santa Rita Mesquite                                            |
| US-Srr  | 10.17190/AMF/1418685 | Brian Bergamaschi  | PI          | USGS                                             | bbergama@usgs.gov               | Suisun marsh - Rush Ranch                                      |
| US-SRS  | 10.17190/AMF/1660351 | Enrique R. Vivoni  | PI          | Arizona State University                         | vivoni@asu.edu                  | Santa Rita Experimental Range Mesquite Savanna                 |
| US-Tw2  | 10.17190/AMF/1246148 | Dennis Baldocchi   | PI          | University of California, Berkeley               | baldocchi@berkeley.edu          | Twitchell Corn                                                 |
| US-Tw3  | 10.17190/AMF/1246149 | Dennis Baldocchi   | PI          | University of California, Berkeley               | baldocchi@berkeley.edu          | Twitchell Alfalfa                                              |
| US-Twt  | 10.17190/AMF/1246140 | Dennis Baldocchi   | PI          | University of California, Berkeley               | baldocchi@berkeley.edu          | Twitchell Island                                               |
| US-Var  | 10.17190/AMF/1245984 | Dennis Baldocchi   | PI          | University of California, Berkeley               | Baldocchi@berkeley.edu          | Vaira Ranch- Ione                                              |
| US-WBW  | 10.17190/AMF/1246109 | Tilden Meyers      | PI          | NOAA/ARL                                         | Tilden.Meyers@noaa.gov          | Walker Branch Watershed                                        |
| US-WCr  | 10.17190/AMF/1246111 | Ankur Desai        | PI          | University of Wisconsin                          | desai@aos.wisc.edu              | Willow Creek                                                   |
| US-Wkg  | 10.17190/AMF/1246112 | Russell Scott      | PI          | United States Department of Agriculture          | russ.scott@ars.usda.gov         | Walnut Gulch Kendall Grasslands                                |
| US-xAE  |                      | Cove Sturtevant    | PI          | NEON                                             | csturtevant@battelleecology.or  | NEON Klemme Range Research Station (OAES)                      |
| US-xDC  | 10.17190/AMF/1617728 | Cove Sturtevant    | PI          | NEON                                             | csturtevant@battelleecology.or  | NEON Dakota Coteau Field School (DCFS)                         |
| US-xDL  | 10.17190/AMF/1579721 | Cove Sturtevant    | PI          | NEON                                             | csturtevant@battelleecology.or  | NEON Dead Lake (DELA)                                          |
| US-xDS  |                      | Cove Sturtevant    | PI          | NEON                                             | csturtevant@battelleecology.or  | NEON Disney Wilderness Preserve (DSNY)                         |



| Site ID       | DOI/link             | Team member         | Member role | Member institution | Member email                   | Site name                                                          |
|---------------|----------------------|---------------------|-------------|--------------------|--------------------------------|--------------------------------------------------------------------|
| US-xNG        | 10.17190/AMF/1617732 | Cove Sturtevant     | PI          | NEON               | csturtevant@battelleecology.or | NEON Northern Great Plains Research Laboratory (NOGP)              |
| US-xRM        | 10.17190/AMF/1579723 | Cove Sturtevant     | PI          | NEON               | csturtevant@battelleecology.or | NEON Rocky Mountain National Park, CASTNET (RMNP)                  |
| US-xSB        |                      | Cove Sturtevant     | PI          | NEON               | csturtevant@battelleecology.or | NEON Ordway-Swisher Biological Station (OSBS)                      |
| US-xSL        | 10.17190/AMF/1617735 | Cove Sturtevant     | PI          | NEON               | csturtevant@battelleecology.or | NEON North Sterling, CO (STER)                                     |
| US-xST        | 10.17190/AMF/1617737 | Cove Sturtevant     | PI          | NEON               | csturtevant@battelleecology.or | NEON Steigerwaldt Land Services (STEI)                             |
| US-xUN        | 10.17190/AMF/1617741 | Cove Sturtevant     | PI          | NEON               | csturtevant@battelleecology.or | NEON University of Notre Dame Environmental Research Center (UNDE) |
| MB_Pch        |                      | Forrest Melton      |             |                    | fmelton@csumb.edu              |                                                                    |
| Ellendale     |                      | Benjamin Runkle     |             |                    | brrunkle@uark.edu              |                                                                    |
| manilacotton  |                      | Benjamin Runkle     |             |                    | brrunkle@uark.edu              |                                                                    |
| stonevillesoy |                      | Saseendran Anapalli |             |                    | saseendran.anapalli@usda.gov   |                                                                    |
| US-OF1        |                      | Benjamin Runkle     |             |                    | brrunkle@uark.edu              |                                                                    |
| US-OF2        |                      | Benjamin Runkle     |             |                    | brrunkle@uark.edu              |                                                                    |
| US-OF4        |                      | Benjamin Runkle     |             |                    | brrunkle@uark.edu              |                                                                    |
| US-OF6        |                      | Benjamin Runkle     |             |                    | brrunkle@uark.edu              |                                                                    |
| S2            |                      | Richard Jasoni      |             |                    | Richard.Jasoni@dri.edu         |                                                                    |
| ALARC2_Smith6 |                      | Andy French         |             |                    | andrew.french@usda.gov         |                                                                    |
| Almond_High   |                      | Ray Anderson        |             |                    | ray.anderson@usda.gov          |                                                                    |
| Almond_Low    |                      | Ray Anderson        |             |                    | ray.anderson@usda.gov          |                                                                    |
| Almond_Med    |                      | Ray Anderson        |             |                    | ray.anderson@usda.gov          |                                                                    |
| JPL1_JV114    |                      | Andy French         |             |                    | andrew.french@usda.gov         |                                                                    |
| JPL1_Smith5   |                      | Andy French         |             |                    | andrew.french@usda.gov         |                                                                    |
| UA1_HartFarm  |                      | Andy French         |             |                    | andrew.french@usda.gov         |                                                                    |
| UA1_JV187     |                      | Andy French         |             |                    | andrew.french@usda.gov         |                                                                    |
| UA1_KN18      |                      | Andy French         |             |                    | andrew.french@usda.gov         |                                                                    |
| UA2_JV330     |                      | Andy French         |             |                    | andrew.french@usda.gov         |                                                                    |
| UA2_KN20      |                      | Andy French         |             |                    | andrew.french@usda.gov         |                                                                    |
| UA3_JV108     |                      | Andy French         |             |                    | andrew.french@usda.gov         |                                                                    |
| UA3_KN15      |                      | Andy French         |             |                    | andrew.french@usda.gov         |                                                                    |
| LYS_NE        |                      | Steven Evett        |             |                    | steve.evett@usda.gov           |                                                                    |
| LYS_NW        |                      | Steven Evett        |             |                    | steve.evett@usda.gov           |                                                                    |
| LYS_SE        |                      | Steven Evett        |             |                    | steve.evett@usda.gov           |                                                                    |
| LYS_SW        |                      | Steven Evett        |             |                    | steve.evett@usda.gov           |                                                                    |
| BAR012        |                      | William Kustas      |             |                    | bill.kustas@usda.gov           |                                                                    |
| RIP760        |                      | William Kustas      |             |                    | bill.kustas@usda.gov           |                                                                    |
| SLM001        |                      | William Kustas      |             |                    | bill.kustas@usda.gov           |                                                                    |
| B_01          | 10.3133/sir20095079  | Kip Allander        |             |                    | kalland@usgs.gov               |                                                                    |
| B_11          | 10.3133/sir20095079  | Kip Allander        |             |                    | kalland@usgs.gov               |                                                                    |
| ET_1          | 10.3133/sir20055288  | Doug Maurer         |             |                    | dkmaurer@usgs.gov              |                                                                    |
| ET_8          | 10.3133/sir20055288  | Doug Maurer         |             |                    | dkmaurer@usgs.gov              |                                                                    |
| MR            | 10.3133/sir20085116  | Guy A. DeMeo        |             |                    | gademeo@usgs.gov               |                                                                    |
| TAM           | 10.3133/sir20095079  | Kip Allander        |             |                    | kalland@usgs.gov               |                                                                    |
| VR            | 10.3133/sir20085116  | Guy A. DeMeo        |             |                    | gademeo@usgs.gov               |                                                                    |
| AFD           | 10.5066/F7R49NZN     | Michael T. Moreo    |             |                    | mtmoreo@usgs.gov               |                                                                    |
| AFS           | 10.5066/F7R49NZN     | Michael T. Moreo    |             |                    | mtmoreo@usgs.gov               |                                                                    |
| BPHV          | 10.5066/F79C6WM9     | Guy A. DeMeo        |             |                    | gademeo@usgs.gov               |                                                                    |
| BPLV          | 10.5066/F79C6WM9     | Guy A. DeMeo        |             |                    | gademeo@usgs.gov               |                                                                    |
| DVDV          | 10.3133/pp1805       | Amanda Garcia       |             |                    | cgarcia@usgs.gov               |                                                                    |
| KV_1          | 10.5066/P9NZ9XSP     | Amanda Garcia       |             |                    | cgarcia@usgs.gov               |                                                                    |
| KV_2          | 10.5066/P9NZ9XSP     | Amanda Garcia       |             |                    | cgarcia@usgs.gov               |                                                                    |
| KV_4          | 10.5066/P9NZ9XSP     | Amanda Garcia       |             |                    | cgarcia@usgs.gov               |                                                                    |
| SPV_1         | 10.3133/sir20075078  | Michael T. Moreo    |             |                    | mtmoreo@usgs.gov               |                                                                    |
| SPV_3         | 10.3133/sir20075078  | Michael T. Moreo    |             |                    | mtmoreo@usgs.gov               |                                                                    |
| SV_5          |                      | Jay Arnone          |             |                    | jarnone@dri.edu                |                                                                    |
| SV_6          |                      | Jay Arnone          |             |                    | jarnone@dri.edu                |                                                                    |
| UMVW          | 10.3133/sir20085116  | Guy A. DeMeo        |             |                    | gademeo@usgs.gov               |                                                                    |
| WRV_1         | 10.3133/sir20075078  | Michael T. Moreo    |             |                    | mtmoreo@usgs.gov               |                                                                    |
| WRV_2         | 10.3133/sir20075078  | Michael T. Moreo    |             |                    | mtmoreo@usgs.gov               |                                                                    |



**Supplementary Discussion 1.** Discussion of energy balance closure error and uncertainty in eddy covariance data used to evaluate OpenET.

The eddy covariance (EC) technique is widely used to estimate vertical turbulent fluxes of latent energy (LE) and sensible heat (H) within a region of interest<sup>3,4</sup>. Other major components of the near surface energy balance (SEB) can often be estimated with additional sensors, commonly soil heat flux plates and a net radiometer to measure soil heat flux (G) and net radiation (Rn), respectively. While EC is widely used for *in situ* ET estimation and is regarded as one of the best available methods, the approach is subject to limitations that can lead to surface energy imbalance<sup>5</sup>. We next discuss some of the major reasons why the method often has additional data uncertainties that can result in misrepresentation of the major SEB components and give examples. We then discuss the steps taken to limit those uncertainties prior to using the EC data to evaluate OpenET remote sensing ET (RSET) data (see also Volk et al.<sup>1,2</sup>, Melton et al.<sup>6</sup>).

Causes of EC closure problems may be grouped into four broad categories: instrument error, data processing error, unaccounted energy sources, and sub-mesoscale transport/secondary circulations<sup>7</sup>. Some error sources can be accounted for by the practitioner, including sensor calibration and maintenance, and high frequency data processing and correction methods<sup>7</sup>. In addition, spectral correction can also account for high-frequency spectral loss due to sensor limitations<sup>8,9</sup>. Many of the SEB error sources EC data are difficult to account for on a post hoc basis. These range from site land cover heterogeneity and terrain complexity, instrumentation type, placement, and micrometeorological conditions that are not well suited for the theoretical assumptions of the EC technique.

A well known source of error that is difficult to account for is sub-mesoscale eddies that are not captured by a single EC tower. This secondary circulation can appear as advection and result in under- or over-estimations of LE and H. Similarly, LE and H can be misrepresented due to other invalidations of the assumptions of the EC technique such as insufficient friction velocity to generate eddies of appropriate scale<sup>10,11</sup>, highly stable or unstable atmospheric boundary conditions<sup>12</sup>, or their combination<sup>13-15</sup>. Another well-known source of uncertainty in EC data is that Rn as measured on a tower and G from soil heat flux plates (point scales) do not correspond with the larger scale of the source area of turbulent fluxes that are temporally dynamic as a function of atmospheric circulations and land cover<sup>16</sup>. The scale mismatch between available energy and turbulent fluxes poses further challenges in assessing the SEB.

Other SEB closure errors in EC data may come from unaccounted energy storage, and these include heat storage in soil, air, and canopies, which can be a significant component of the SEB depending on the micrometeorological conditions and timescale<sup>5,7</sup>. For example, heat storage in air and biomass, as well as chemical energy stored during photosynthesis, are often overlooked as a source of SEB error in EC data<sup>17,18</sup> and it is often not reported with EC data or not feasible

to be estimated because the required measurements are expensive, requiring additional gas and thermal probes placed along the vertical profile<sup>19</sup>. Soil heat storage above a soil heat flux plate can be readily measured and corrected for by using thermocouples to estimate the vertical thermal profile<sup>20</sup>. Plant physiology in response to micrometeorological conditions can also change the SEB; for example, in a water limited environment with plenty of available energy and warm and dry air, some plants may temporarily close their stomata to preserve water, leading to a reduction in LE and an increase in H.

Some of the sources of SEB errors (including some of those previously mentioned) may be limited by following best practices or by using post-processing techniques. For example: appropriate site placement and footprint representation<sup>4,16</sup>, limiting instrumentation error caused by improper maintenance and calibration, e.g., cleaning dust from net radiometers can reduce error<sup>21</sup>, and accounting for the heat storage in soil can reduce SEB error, particularly at sub-daily timescales<sup>5,17</sup>. Errors from instrumentation, high frequency data processing and averaging, data corrections are also important sources of uncertainty that can be accounted for by most practitioners who follow best practices, such as those set by AmeriFlux<sup>22</sup>.

Acknowledging the inherent issues with EC data and SEB error, and that much of the decisions and steps that are needed to limit SEB error are dependent on the initial deployment of each EC system, maintenance, and processing of high-frequency data— we took further steps to limit SEB related uncertainty in the dataset used in this study. First, we gathered data from networks, such as AmeriFlux<sup>22</sup>, which follow best practices in EC system installation, instrumentation, maintenance, and data processing. AmeriFlux provides services to help site principal investigators (PI) and technicians install EC systems, setup instrumentation and calibrate them, and perform data quality control and high frequency data processing (<https://ameriflux.lbl.gov/about/ameriflux-management-project/>). When gathering EC data, particularly those from other networks and university partners, we asked PIs about their site instrumentation and data quality control techniques to ensure that they were like those recommended by trusted networks. For example, we made efforts to ensure that all soil heat flux measurements were corrected for soil heat storage above heat flux plates. We also used data subject to prior quality control checks when provided. In the cases of multiple soil heat flux plate measurements, we used either the PI approved records or took the average from multiple sensors. In developing the benchmark flux dataset, we only considered flux stations where continuous measurements of all four SEB components were measured so that we could assess energy balance closure error; all of the EC stations used employed high quality instrumentation including a 3-D sonic anemometer, an open-path infrared gas analyzer, a net radiometer, and soil heat flux plates<sup>1,2</sup>.

After the initial collection of EC data, we performed a series of quality control checks and post-processing steps, culminating with SEB closure corrections applied to turbulent fluxes<sup>1,2</sup>.

Together these steps aimed to limit the uncertainty inherent in EC data. The first step of flux data post-processing we performed was a conservative gap-filling procedure on the half-hourly records of the SEB components using linear interpolation, where we limited the total number of gap-filled hours per day to 2 hours. This approach is more conservative than the FLUXNET2015/ONEFlux methods that use longer gap-filling windows<sup>1,2,23</sup>. We averaged the gap-filled SEB components to 24-hour periods, this decision was made for two reasons: (1) the OpenET models output daily ET; and (2) to limit the error caused by diurnal phase shifts in heat storage (in soil, air, and biomass), available energy, and turbulent fluxes that may result in SEB error that are higher at shorter timescales. We acknowledge that 24-hour averaging will not remove all sources of SEB error, such as energy use by photosynthesis or storage of energy in dense canopies, however it will limit some of the error. For example, soil heat storage will often have a strong diurnal pattern, going up during the morning and releasing heat as longwave radiation in the afternoon and evening and often canceling out over 24 hours<sup>5,17</sup>. Similar patterns are true for heat storage in canopies and air. For example, storage of latent energy in air can follow a diurnal pattern where energy storage increases during the day and energy is released when nighttime temperatures drop and condensation (dew) forms. We tested for average closure at longer time scales (e.g. weeks to months), with similar results to average daily closure at most sites. After daily averaging of SEB components, we performed visual quality control checks for each EC station's SEB data, removing periods of data that had clear data quality issues such as spikes, trends, and other systematic errors. Data periods that had poor closure, but no clear data problems were further investigated using the EC station micrometeorological data, gridded climate data and reference ET, visual inspection of site land cover and aerial imagery, and sometimes by simply asking site PIs for their insight. For example, some sites that were subject to high levels of smoke from nearby wildfires had suspect data records that were filtered out during those seasons. Other sites with suspected data quality issues were found to be in locations with complex terrain or too near to unrepresentative land cover which would cause invalidation of the assumptions of the EC technique, and these sites were removed from the selection of sites. Next, we further filtered out EC stations that had an average daily SEB closure error that exceeded 25% in the growing season and 40% during the non-growing season. Growing seasons start and end dates were determined using long-term climate data for each site<sup>1</sup>. Lastly, we applied the FLUXNET2015/ONEFlux method of correcting daily average latent energy flux (ET); this approach uses the energy balance ratio over moving windows (typically 15 days) to correct LE and  $H^{23}$ . The FLUXNET2015/ONEFlux methods represent the most standardized approaches to processing EC data, and we think it is important to follow well established methods. Because the ONEFlux method uses the average energy balance ratio determined over moving windows, it does not force closure on a given date but results in a more conservative correction and may help account for energy imbalances that have longer timescales such as heat storage in wetland and riparian zones, or dense woody canopies<sup>18</sup>. One limitation of the energy balance ratio approach for SEB closure correction is that it assumes both LE and H are to be corrected by the same factor, i.e., that LE and H are both under- or over-estimated by equal

proportions which is not always the case. There is some evidence based on data from the large sample EC dataset used in this study that LE and H both tend to be underestimated by similar proportions, with perhaps slightly more underestimation of LE than H on average for cropland sites<sup>1</sup>. Lastly, although not an active data processing step, the large number of flux sites used in this study (141) acts to dampen any systematic SEB error and biases that may be present in some sites or small samples of sites.

The screening and other procedures we used to limit SEB error in the flux data resulted in a dataset with less energy balance closure error than what is typically reported from large studies involving half-hourly fluxes. For example, we found a daily average closure error of 0.88 or 12% underestimation of LE + H, most other studies involving AmeriFlux data report closure error between 20–30%<sup>10,11,24</sup>. We acknowledge that the EC dataset still has SEB uncertainty and other errors that are difficult or currently impossible to account for, and that the ground data may thus have inherent limitations as a basis for RSET evaluation. Yet, this study possibly represents the most extensive assessment of RSET accuracy performed to date and the EC dataset used for comparison provides a consistent, reproducible benchmark for evaluation of the RSET data from all individual models. While the results are subject to revision in response to future improvements in characterization of ground data uncertainty, they should offer useful insight to absolute accuracies as well as relative performance across models and land cover types.

**Supplementary Table 2.** Daily statistical metrics for OpenET<sup>6</sup> models compared against paired closed flux tower daily ET<sup>1,2</sup> for sites grouped by their general land cover type. Data pairing was limited to days of satellite overpass (every 8 days in the case of Landsat, assuming clear-sky conditions). Slope is calculated as the linear regression slope forced through the origin. Measures of mean-bias-error (MBE), mean-absolute-error (MAE), and root-mean-square-error (RMSE) include the error in mm day<sup>-1</sup> and normalized as a percentage of the weighted mean closed flux tower ET. Daily results for SIMS exclude soil evaporation from precipitation, which has been recently added to the SIMS model but was not included in the daily data from SIMS used in this analysis.

| Land cover type                                        | Statistic | Ensemble       | DisALEXI      | eeMETRIC      | geeSEBAL       | PT-JPL        | SIMS           | SSEBop         | N sites | N data points |
|--------------------------------------------------------|-----------|----------------|---------------|---------------|----------------|---------------|----------------|----------------|---------|---------------|
| Croplands<br>Mean station ET =<br>3.5 (mm/day)         | Slope     | 0.86           | 0.87          | 0.92          | 0.8            | 0.85          | 0.85           | 0.93           | 60      | 5255          |
|                                                        | MBE (mm)  | -0.35 (-10.0%) | -0.31 (-8.8%) | -0.11 (-3.1%) | -0.57 (-16.2%) | -0.21 (-6.0%) | -0.41 (-11.7%) | -0.26 (-7.4%)  | 52      | 5225          |
|                                                        | MAE (mm)  | 0.83 (23.6%)   | 0.96 (27.4%)  | 1.04 (29.6%)  | 1.14 (32.5%)   | 0.96 (27.4%)  | 0.9 (25.6%)    | 1.03 (29.3%)   | 52      | 5225          |
|                                                        | RMSE (mm) | 1.09 (31.1%)   | 1.26 (35.9%)  | 1.35 (38.5%)  | 1.47 (41.9%)   | 1.25 (35.6%)  | 1.2 (34.2%)    | 1.32 (37.6%)   | 52      | 5225          |
|                                                        | R-squared | 0.81           | 0.73          | 0.7           | 0.68           | 0.74          | 0.78           | 0.74           | 60      | 5255          |
| Evergreen Forests<br>Mean station ET =<br>2.3 (mm/day) | Slope     | 1.21           | 1.23          | 1.16          | 1.29           | 1.15          | NA             | 1.19           | 17      | 1756          |
|                                                        | MBE (mm)  | 0.73 (31.6%)   | 0.78 (33.8%)  | 0.54 (23.4%)  | 0.92 (39.8%)   | 0.77 (33.3%)  | NA             | 0.69 (29.9%)   | 16      | 1754          |
|                                                        | MAE (mm)  | 1.05 (45.5%)   | 1.23 (53.2%)  | 1.21 (52.4%)  | 1.33 (57.6%)   | 1.04 (45.0%)  | NA             | 1.15 (49.8%)   | 16      | 1754          |
|                                                        | RMSE (mm) | 1.26 (54.5%)   | 1.48 (64.1%)  | 1.53 (66.2%)  | 1.63 (70.6%)   | 1.22 (52.8%)  | NA             | 1.4 (60.6%)    | 16      | 1754          |
|                                                        | R-squared | 0.54           | 0.43          | 0.4           | 0.45           | 0.54          | NA             | 0.42           | 17      | 1756          |
| Grasslands<br>Mean station ET =<br>1.7 (mm/day)        | Slope     | 0.87           | 0.87          | 0.87          | 0.89           | 0.96          | NA             | 0.78           | 27      | 3911          |
|                                                        | MBE (mm)  | -0.06 (-3.5%)  | 0.08 (4.7%)   | -0.1 (-5.8%)  | 0.05 (2.9%)    | 0.19 (11.0%)  | NA             | -0.25 (-14.5%) | 27      | 3911          |
|                                                        | MAE (mm)  | 0.77 (44.8%)   | 0.9 (52.3%)   | 0.95 (55.2%)  | 1.19 (69.2%)   | 0.78 (45.3%)  | NA             | 0.81 (47.1%)   | 27      | 3911          |
|                                                        | RMSE (mm) | 0.99 (57.6%)   | 1.13 (65.7%)  | 1.27 (73.8%)  | 1.57 (91.3%)   | 1.0 (58.1%)   | NA             | 1.05 (61.0%)   | 27      | 3911          |
|                                                        | R-squared | 0.56           | 0.46          | 0.45          | 0.22           | 0.57          | NA             | 0.53           | 27      | 3911          |
| Mixed Forests<br>Mean station ET =<br>2.2 (mm/day)     | Slope     | 1.08           | 1.11          | 0.92          | 1.19           | 1.1           | NA             | 1.08           | 14      | 1114          |
|                                                        | MBE (mm)  | 0.48 (21.9%)   | 0.46 (21.0%)  | -0.03 (-1.4%) | 0.86 (39.3%)   | 0.74 (33.8%)  | NA             | 0.45 (20.5%)   | 12      | 1105          |
|                                                        | MAE (mm)  | 0.8 (36.5%)    | 0.84 (38.4%)  | 0.89 (40.6%)  | 1.19 (54.3%)   | 1.02 (46.6%)  | NA             | 0.86 (39.3%)   | 12      | 1105          |
|                                                        | RMSE (mm) | 1.05 (47.9%)   | 1.11 (50.7%)  | 1.22 (55.7%)  | 1.52 (69.4%)   | 1.27 (58.0%)  | NA             | 1.17 (53.4%)   | 12      | 1105          |
|                                                        | R-squared | 0.78           | 0.77          | 0.65          | 0.68           | 0.72          | NA             | 0.71           | 14      | 1114          |
| Shrublands<br>Mean station ET =<br>1.2 (mm/day)        | Slope     | 0.97           | 1             | 0.88          | 1.1            | 1.07          | NA             | 0.81           | 26      | 3370          |
|                                                        | MBE (mm)  | 0.05 (4.3%)    | 0.16 (13.8%)  | -0.07 (-6.0%) | 0.32 (27.6%)   | 0.3 (25.9%)   | NA             | -0.21 (-18.1%) | 26      | 3370          |
|                                                        | MAE (mm)  | 0.62 (53.4%)   | 0.72 (62.1%)  | 0.81 (69.8%)  | 0.99 (85.3%)   | 0.68 (58.6%)  | NA             | 0.61 (52.6%)   | 26      | 3370          |
|                                                        | RMSE (mm) | 0.81 (69.8%)   | 0.92 (79.3%)  | 1.07 (92.2%)  | 1.31 (112.9%)  | 0.84 (72.4%)  | NA             | 0.82 (70.7%)   | 26      | 3370          |
|                                                        | R-squared | 0.54           | 0.47          | 0.39          | 0.35           | 0.53          | NA             | 0.56           | 26      | 3370          |
| Wetlands<br>Mean station ET =<br>3.2 (mm/day)          | Slope     | 1.02           | 1.07          | 1.08          | 1.01           | 0.94          | NA             | 0.97           | 9       | 1038          |
|                                                        | MBE (mm)  | 0.32 (10.0%)   | 0.63 (19.7%)  | 0.47 (14.7%)  | 0.35 (11.0%)   | 0.14 (4.4%)   | NA             | 0.09 (2.8%)    | 9       | 1038          |
|                                                        | MAE (mm)  | 1.01 (31.7%)   | 1.18 (37.0%)  | 1.23 (38.6%)  | 1.3 (40.8%)    | 1.15 (36.1%)  | NA             | 0.94 (29.5%)   | 9       | 1038          |
|                                                        | RMSE (mm) | 1.25 (39.2%)   | 1.44 (45.1%)  | 1.53 (48.0%)  | 1.64 (51.4%)   | 1.45 (45.5%)  | NA             | 1.2 (37.6%)    | 9       | 1038          |
|                                                        | R-squared | 0.72           | 0.63          | 0.63          | 0.56           | 0.61          | NA             | 0.73           | 9       | 1038          |

**Supplementary Table 3.** Monthly statistical metrics from comparisons between OpenET<sup>6</sup> models and closed flux tower monthly ET<sup>1,2</sup> for sites grouped by their general land cover type. Slope is calculated as the linear regression slope forced through the origin. Measures of mean-bias-error (MBE), mean-absolute-error (MAE), and root-mean-square-error (RMSE) include the error in mm month<sup>-1</sup> and normalized as a percentage of the weighted mean closed flux tower ET.

| Land cover type                                         | Statistic | Ensemble      | DisALEXI      | eeMETRIC      | geeSEBAL        | PT-JPL        | SIMS          | SSEBop         | N sites | N data points |
|---------------------------------------------------------|-----------|---------------|---------------|---------------|-----------------|---------------|---------------|----------------|---------|---------------|
| Croplands<br>Mean station ET =<br>91 (mm/month)         | Slope     | 0.92          | 0.92          | 0.95          | 0.85            | 0.91          | 0.99          | 0.95           | 53      | 1652          |
|                                                         | MBE (mm)  | -5.27 (-5.8%) | -7.72 (-8.4%) | -2.44 (-2.7%) | -12.18 (-13.3%) | -2.9 (-3.2%)  | 4.32 (4.7%)   | -6.08 (-6.7%)  | 44      | 1638          |
|                                                         | MAE (mm)  | 15.84 (17.3%) | 19.91 (21.8%) | 21.23 (23.2%) | 22.69 (24.8%)   | 18.12 (19.8%) | 17.93 (19.6%) | 22.4 (24.5%)   | 44      | 1638          |
|                                                         | RMSE (mm) | 20.44 (22.4%) | 25.35 (27.7%) | 26.97 (29.5%) | 29.05 (31.8%)   | 23.67 (25.9%) | 23.1 (25.3%)  | 27.72 (30.3%)  | 44      | 1638          |
|                                                         | R-squared | 0.9           | 0.86          | 0.83          | 0.83            | 0.87          | 0.86          | 0.85           | 53      | 1652          |
| Evergreen Forests<br>Mean station ET =<br>62 (mm/month) | Slope     | 1.24          | 1.3           | 1.17          | 1.34            | 1.17          | NA            | 1.23           | 14      | 662           |
|                                                         | MBE (mm)  | 16.8 (27.3%)  | 18.83 (30.6%) | 10.78 (17.5%) | 22.93 (37.3%)   | 16.22 (26.4%) | NA            | 16.71 (27.2%)  | 13      | 660           |
|                                                         | MAE (mm)  | 24.68 (40.1%) | 29.06 (47.2%) | 25.94 (42.2%) | 31.27 (50.8%)   | 25.11 (40.8%) | NA            | 26.84 (43.6%)  | 13      | 660           |
|                                                         | RMSE (mm) | 29.96 (48.7%) | 34.75 (56.5%) | 31.76 (51.6%) | 38.2 (62.1%)    | 29.88 (48.6%) | NA            | 32.63 (53.0%)  | 13      | 660           |
|                                                         | R-squared | 0.62          | 0.55          | 0.55          | 0.59            | 0.58          | NA            | 0.52           | 14      | 662           |
| Grasslands<br>Mean station ET =<br>40 (mm/month)        | Slope     | 0.87          | 0.88          | 0.89          | 0.89            | 1.02          | NA            | 0.78           | 18      | 626           |
|                                                         | MBE (mm)  | -0.88 (-2.2%) | 2.4 (6.0%)    | -1.77 (-4.4%) | 2.96 (7.4%)     | 6.68 (16.7%)  | NA            | -6.2 (-15.5%)  | 18      | 626           |
|                                                         | MAE (mm)  | 18.02 (45.1%) | 20.33 (50.9%) | 19.65 (49.2%) | 27.15 (67.9%)   | 19.84 (49.6%) | NA            | 17.99 (45.0%)  | 18      | 626           |
|                                                         | RMSE (mm) | 22.72 (56.9%) | 25.67 (64.2%) | 25.21 (63.1%) | 35.57 (89.0%)   | 24.22 (60.6%) | NA            | 22.45 (56.2%)  | 18      | 626           |
|                                                         | R-squared | 0.54          | 0.48          | 0.56          | 0.22            | 0.56          | NA            | 0.53           | 18      | 626           |
| Mixed Forests<br>Mean station ET =<br>62 (mm/month)     | Slope     | 1.19          | 1.14          | 1.06          | 1.3             | 1.2           | NA            | 1.22           | 10      | 225           |
|                                                         | MBE (mm)  | 17.72 (28.8%) | 13.51 (21.9%) | 6.55 (10.6%)  | 27.32 (44.4%)   | 22.35 (36.3%) | NA            | 18.93 (30.8%)  | 10      | 225           |
|                                                         | MAE (mm)  | 19.76 (32.1%) | 19.37 (31.5%) | 18.55 (30.1%) | 30.32 (49.3%)   | 23.79 (38.7%) | NA            | 22.03 (35.8%)  | 10      | 225           |
|                                                         | RMSE (mm) | 24.73 (40.2%) | 24.12 (39.2%) | 25.12 (40.8%) | 36.0 (58.5%)    | 28.61 (46.5%) | NA            | 27.59 (44.8%)  | 10      | 225           |
|                                                         | R-squared | 0.87          | 0.85          | 0.79          | 0.81            | 0.85          | NA            | 0.83           | 10      | 225           |
| Shrublands<br>Mean station ET =<br>31 (mm/month)        | Slope     | 0.98          | 0.98          | 0.91          | 1.18            | 1.12          | NA            | 0.78           | 24      | 656           |
|                                                         | MBE (mm)  | 2.27 (7.4%)   | 2.64 (8.6%)   | -1.84 (-6.0%) | 11.38 (37.0%)   | 8.57 (27.9%)  | NA            | -6.17 (-20.1%) | 24      | 656           |
|                                                         | MAE (mm)  | 15.28 (49.7%) | 16.84 (54.7%) | 19.09 (62.0%) | 22.07 (71.7%)   | 17.38 (56.5%) | NA            | 14.5 (47.1%)   | 24      | 656           |
|                                                         | RMSE (mm) | 19.27 (62.6%) | 20.92 (68.0%) | 23.64 (76.8%) | 28.55 (92.8%)   | 20.8 (67.6%)  | NA            | 17.98 (58.4%)  | 24      | 656           |
|                                                         | R-squared | 0.48          | 0.46          | 0.4           | 0.36            | 0.47          | NA            | 0.57           | 24      | 656           |
| Wetland/Riparian<br>Mean station ET =<br>88 (mm/month)  | Slope     | 1.06          | 1.14          | 1.11          | 1.06            | 0.99          | NA            | 1.02           | 8       | 286           |
|                                                         | MBE (mm)  | 11.9 (13.5%)  | 20.88 (23.7%) | 14.52 (16.5%) | 14.45 (16.4%)   | 8.84 (10.0%)  | NA            | 5.29 (6.0%)    | 7       | 285           |
|                                                         | MAE (mm)  | 25.94 (29.5%) | 31.38 (35.7%) | 31.75 (36.1%) | 32.88 (37.4%)   | 28.69 (32.6%) | NA            | 21.61 (24.6%)  | 7       | 285           |
|                                                         | RMSE (mm) | 31.31 (35.6%) | 37.85 (43.0%) | 37.04 (42.1%) | 41.01 (46.6%)   | 36.14 (41.1%) | NA            | 27.01 (30.7%)  | 7       | 285           |
|                                                         | R-squared | 0.75          | 0.69          | 0.68          | 0.61            | 0.65          | NA            | 0.8            | 8       | 286           |



**Supplementary Table 4.** Growing season statistical metrics for OpenET<sup>6</sup> models against paired closed flux tower growing season ET<sup>1,2</sup> for sites grouped by their general land cover type. Growing seasons were defined based on long-term climate for each site, and monthly ET totals were used to aggregate to growing season periods<sup>1</sup>. Slope is calculated as the linear regression slope forced through the origin. Measures of mean-bias-error (MBE), mean-absolute-error (MAE), and root-mean-square-error (RMSE) include the error in mm season<sup>-1</sup> and normalized as a percentage of the weighted mean closed flux tower ET.

| Land cover type                                                 | Statistic | Ensemble       | DisALEXI       | eeMETRIC       | geeSEBAL        | PT-JPL         | SIMS           | SSEBop          | N sites | N data points |
|-----------------------------------------------------------------|-----------|----------------|----------------|----------------|-----------------|----------------|----------------|-----------------|---------|---------------|
| Croplands<br>Mean station ET = 605 (mm/growing season)          | Slope     | 0.96           | 0.95           | 0.99           | 0.87            | 0.98           | 1.04           | 0.97            | 39      | 177           |
|                                                                 | MBE (mm)  | -11.9 (-2.0%)  | -22.34 (-3.7%) | 7.72 (1.3%)    | -67.04 (-11.1%) | 3.12 (0.5%)    | 45.79 (7.6%)   | -12.44 (-2.1%)  | 39      | 177           |
|                                                                 | MAE (mm)  | 78.14 (12.9%)  | 101.64 (16.8%) | 93.58 (15.5%)  | 108.93 (18.0%)  | 94.03 (15.5%)  | 101.81 (16.8%) | 103.85 (17.2%)  | 39      | 177           |
|                                                                 | RMSE (mm) | 93.79 (15.5%)  | 112.64 (18.6%) | 114.5 (18.9%)  | 123.54 (20.4%)  | 111.74 (18.5%) | 125.07 (20.7%) | 120.04 (19.8%)  | 39      | 177           |
|                                                                 | R-squared | 0.87           | 0.84           | 0.82           | 0.83            | 0.83           | 0.79           | 0.82            | 39      | 177           |
| Evergreen Forests<br>Mean station ET = 217 (mm /growing season) | Slope     | 1.16           | 1.1            | 1.04           | 1.29            | 1.25           | NA             | 1.1             | 14      | 94            |
|                                                                 | MBE (mm)  | 74.66 (34.4%)  | 64.76 (29.8%)  | 44.28 (20.4%)  | 112.74 (52.0%)  | 95.13 (43.8%)  | NA             | 62.02 (28.6%)   | 14      | 94            |
|                                                                 | MAE (mm)  | 99.99 (46.1%)  | 105.34 (48.5%) | 99.09 (45.7%)  | 129.68 (59.8%)  | 104.65 (48.2%) | NA             | 110.16 (50.8%)  | 14      | 94            |
|                                                                 | RMSE (mm) | 117.11 (54.0%) | 125.41 (57.8%) | 119.38 (55.0%) | 149.97 (69.1%)  | 125.63 (57.9%) | NA             | 127.47 (58.7%)  | 14      | 94            |
|                                                                 | R-squared | 0.74           | 0.67           | 0.69           | 0.73            | 0.79           | NA             | 0.67            | 14      | 94            |
| Grasslands<br>Mean station ET = 207 (mm/growing season)         | Slope     | 1.06           | 1.05           | 1              | 1.19            | 1.33           | NA             | 0.96            | 17      | 98            |
|                                                                 | MBE (mm)  | 8.05 (3.9%)    | 17.67 (8.5%)   | -0.64 (-0.3%)  | 30.87 (14.9%)   | 47.56 (23.0%)  | NA             | -16.69 (-8.1%)  | 17      | 98            |
|                                                                 | MAE (mm)  | 78.68 (38.0%)  | 86.86 (42.0%)  | 82.16 (39.7%)  | 120.45 (58.2%)  | 92.37 (44.6%)  | NA             | 74.65 (36.1%)   | 17      | 98            |
|                                                                 | RMSE (mm) | 86.63 (41.9%)  | 98.91 (47.8%)  | 91.05 (44.0%)  | 135.22 (65.3%)  | 100.29 (48.4%) | NA             | 82.58 (39.9%)   | 17      | 98            |
|                                                                 | R-squared | 0.55           | 0.51           | 0.51           | 0.36            | 0.59           | NA             | 0.58            | 17      | 98            |
| Mixed Forests<br>Mean station ET = 265 (mm/growing season)      | Slope     | 1.19           | 1.1            | 1.07           | 1.29            | 1.23           | NA             | 1.24            | 10      | 45            |
|                                                                 | MBE (mm)  | 56.29 (21.2%)  | 36.74 (13.9%)  | 21.17 (8.0%)   | 87.03 (32.8%)   | 71.25 (26.9%)  | NA             | 64.48 (24.3%)   | 10      | 45            |
|                                                                 | MAE (mm)  | 58.92 (22.2%)  | 46.27 (17.5%)  | 49.04 (18.5%)  | 89.85 (33.9%)   | 73.16 (27.6%)  | NA             | 68.44 (25.8%)   | 10      | 45            |
|                                                                 | RMSE (mm) | 69.02 (26.0%)  | 55.65 (21.0%)  | 60.69 (22.9%)  | 99.03 (37.4%)   | 79.33 (29.9%)  | NA             | 84.78 (32.0%)   | 10      | 45            |
|                                                                 | R-squared | 0.96           | 0.95           | 0.92           | 0.95            | 0.97           | NA             | 0.93            | 10      | 45            |
| Shrublands<br>Mean station ET = 183 (mm/growing season)         | Slope     | 1.1            | 1.06           | 1.08           | 1.32            | 1.27           | NA             | 0.83            | 21      | 88            |
|                                                                 | MBE (mm)  | 10.84 (5.9%)   | 10.11 (5.5%)   | -2.76 (-1.5%)  | 58.89 (32.2%)   | 42.8 (23.4%)   | NA             | -33.24 (-18.2%) | 21      | 88            |
|                                                                 | MAE (mm)  | 73.09 (39.9%)  | 73.9 (40.4%)   | 95.41 (52.1%)  | 99.99 (54.6%)   | 83.49 (45.6%)  | NA             | 65.16 (35.6%)   | 21      | 88            |
|                                                                 | RMSE (mm) | 81.48 (44.5%)  | 84.35 (46.1%)  | 107.45 (58.7%) | 113.11 (61.8%)  | 93.13 (50.9%)  | NA             | 71.76 (39.2%)   | 21      | 88            |
|                                                                 | R-squared | 0.5            | 0.48           | 0.47           | 0.47            | 0.46           | NA             | 0.55            | 21      | 88            |
| Wetlands<br>Mean station ET = 500 (mm/growing season)           | Slope     | 1.15           | 1.23           | 1.19           | 1.14            | 1.09           | NA             | 1.08            | 8       | 39            |
|                                                                 | MBE (mm)  | 97.48 (19.5%)  | 150.59 (30.1%) | 113.1 (22.6%)  | 110.08 (22.0%)  | 84.09 (16.8%)  | NA             | 58.21 (11.6%)   | 8       | 39            |
|                                                                 | MAE (mm)  | 135.08 (27.0%) | 167.16 (33.4%) | 160.54 (32.1%) | 155.88 (31.2%)  | 164.65 (32.9%) | NA             | 110.62 (22.1%)  | 8       | 39            |
|                                                                 | RMSE (mm) | 159.49 (31.9%) | 184.52 (36.9%) | 181.02 (36.2%) | 178.84 (35.8%)  | 194.73 (38.9%) | NA             | 132.09 (26.4%)  | 8       | 39            |
|                                                                 | R-squared | 0.88           | 0.88           | 0.84           | 0.86            | 0.76           | NA             | 0.89            | 8       | 39            |

**Supplementary Table 5.** Water year (October 1 through September 30) statistical metrics for OpenET<sup>6</sup> models against paired closed flux tower ET<sup>1,2</sup> for sites grouped by their general land cover type. Water year totals were aggregated from monthly ET data. Slope is calculated as the linear regression slope forced through the origin. Measures of mean-bias-error (MBE), mean-absolute-error (MAE), and root-mean-square-error (RMSE) include the error in mm year<sup>-1</sup> and normalized as a percentage of the weighted mean closed flux tower ET.

| Land cover type                                            | Statistic | Ensemble       | DisALEXI       | eeMETRIC       | geeSEBAL         | PT-JPL          | SIMS           | SSEBop         | N sites | N data points |
|------------------------------------------------------------|-----------|----------------|----------------|----------------|------------------|-----------------|----------------|----------------|---------|---------------|
| Croplands<br>Mean station ET = 991 (mm/water year)         | Slope     | 0.91           | 0.91           | 0.93           | 0.83             | 0.96            | 1.01           | 0.91           | 16      | 72            |
|                                                            | MBE (mm)  | -73.91 (-7.5%) | -79.8 (-8.1%)  | -56.15 (-5.7%) | -146.74 (-14.8%) | -27.98 (-2.8%)  | 28.07 (2.8%)   | -84.74 (-8.6%) | 16      | 72            |
|                                                            | MAE (mm)  | 112.12 (11.3%) | 151.46 (15.3%) | 133.46 (13.5%) | 175.98 (17.8%)   | 99.66 (10.1%)   | 120.47 (12.2%) | 164.84 (16.6%) | 16      | 72            |
|                                                            | RMSE (mm) | 121.87 (12.3%) | 158.15 (16.0%) | 145.12 (14.6%) | 188.02 (19.0%)   | 107.12 (10.8%)  | 130.37 (13.2%) | 176.24 (17.8%) | 16      | 72            |
|                                                            | R-squared | 0.84           | 0.75           | 0.69           | 0.72             | 0.83            | 0.7            | 0.76           | 16      | 72            |
| Evergreen Forests<br>Mean station ET = 657 (mm/water year) | Slope     | 1.19           | 1.33           | 1.11           | 1.25             | 1.1             | NA             | 1.18           | 3       | 6             |
|                                                            | MBE (mm)  | 164.32 (25.0%) | 259.4 (39.5%)  | 90.18 (13.7%)  | 226.86 (34.5%)   | 112.0 (17.0%)   | NA             | 138.73 (21.1%) | 3       | 6             |
|                                                            | MAE (mm)  | 211.22 (32.1%) | 326.4 (49.7%)  | 210.22 (32.0%) | 226.86 (34.5%)   | 161.37 (24.6%)  | NA             | 276.2 (42.0%)  | 3       | 6             |
|                                                            | RMSE (mm) | 221.08 (33.6%) | 334.42 (50.9%) | 216.12 (32.9%) | 235.04 (35.8%)   | 166.33 (25.3%)  | NA             | 284.57 (43.3%) | 3       | 6             |
|                                                            | R-squared | 0.45           | 0.33           | 0.19           | 0.7              | 0.8             | NA             | 0.15           | 3       | 6             |
| Grasslands<br>Mean station ET = 244 (mm/water year)        | Slope     | 1.57           | 1.45           | 1.49           | 1.95             | 1.95            | NA             | 1.42           | 2       | 15            |
|                                                            | MBE (mm)  | 151.99 (62.3%) | 119.58 (49.0%) | 150.9 (61.8%)  | 286.78 (117.5%)  | 240.13 (98.4%)  | NA             | 113.93 (46.7%) | 2       | 15            |
|                                                            | MAE (mm)  | 151.99 (62.3%) | 122.8 (50.3%)  | 151.92 (62.3%) | 286.78 (117.5%)  | 273.12 (111.9%) | NA             | 119.23 (48.9%) | 2       | 15            |
|                                                            | RMSE (mm) | 163.81 (67.1%) | 138.35 (56.7%) | 167.65 (68.7%) | 302.87 (124.1%)  | 274.15 (112.4%) | NA             | 139.15 (57.0%) | 2       | 15            |
|                                                            | R-squared | 0.72           | 0.71           | 0.6            | 0.48             | 0.72            | NA             | 0.59           | 2       | 15            |

**Supplementary Table 6.** Calendar year statistical metrics for OpenET<sup>6</sup> models against paired closed flux tower ET<sup>1,2</sup> for sites grouped by their general land cover type. Annual totals were aggregated from monthly ET data. Slope is calculated as the linear regression slope forced through the origin. Measures of mean-bias-error (MBE), mean-absolute-error (MAE), and root-mean-square-error (RMSE) include the error in mm year<sup>-1</sup> and normalized as a percentage of the weighted mean closed flux tower ET.

| Land cover type                                                  | Statistic | Ensemble       | DisALEXI       | eeMETRIC       | geeSEBAL         | PT-JPL          | SIMS           | SSEBop         | N sites | N data points |
|------------------------------------------------------------------|-----------|----------------|----------------|----------------|------------------|-----------------|----------------|----------------|---------|---------------|
| Croplands<br>Mean station ET = 973<br>(mm/calendar year)         | Slope     | 0.93           | 0.93           | 0.95           | 0.84             | 0.98            | 1.05           | 0.92           | 14      | 69            |
|                                                                  | MBE (mm)  | -49.17 (-5.1%) | -49.36 (-5.1%) | -34.85 (-3.6%) | -135.77 (-14.0%) | -5.65 (-0.6%)   | 73.58 (7.6%)   | -59.93 (-6.2%) | 14      | 69            |
|                                                                  | MAE (mm)  | 108.8 (11.2%)  | 141.49 (14.5%) | 136.39 (14.0%) | 178.99 (18.4%)   | 100.45 (10.3%)  | 149.31 (15.3%) | 141.89 (14.6%) | 14      | 69            |
|                                                                  | RMSE (mm) | 122.41 (12.6%) | 150.13 (15.4%) | 154.24 (15.9%) | 196.05 (20.1%)   | 111.33 (11.4%)  | 164.26 (16.9%) | 156.75 (16.1%) | 14      | 69            |
|                                                                  | R-squared | 0.78           | 0.7            | 0.64           | 0.65             | 0.8             | 0.56           | 0.72           | 14      | 69            |
| Evergreen Forests<br>Mean station ET = 651<br>(mm/calendar year) | Slope     | 1.14           | 1.24           | 1.06           | 1.22             | 1.08            | NA             | 1.1            | 4       | 7             |
|                                                                  | MBE (mm)  | 100.81 (15.5%) | 155.37 (23.9%) | 18.42 (2.8%)   | 197.79 (30.4%)   | 104.39 (16.0%)  | NA             | 54.7 (8.4%)    | 4       | 7             |
|                                                                  | MAE (mm)  | 176.29 (27.1%) | 300.17 (46.1%) | 202.35 (31.1%) | 197.79 (30.4%)   | 152.28 (23.4%)  | NA             | 245.66 (37.7%) | 4       | 7             |
|                                                                  | RMSE (mm) | 182.83 (28.1%) | 305.62 (46.9%) | 206.68 (31.7%) | 203.99 (31.3%)   | 157.7 (24.2%)   | NA             | 251.08 (38.6%) | 4       | 7             |
|                                                                  | R-squared | 0.54           | 0.04           | 0.36           | 0.8              | 0.76            | NA             | 0.14           | 4       | 7             |
| Grasslands<br>Mean station ET = 245<br>(mm/calendar year)        | Slope     | 1.56           | 1.44           | 1.45           | 1.97             | 2               | NA             | 1.42           | 2       | 16            |
|                                                                  | MBE (mm)  | 149.97 (61.2%) | 121.09 (49.4%) | 103.82 (42.4%) | 300.2 (122.5%)   | 248.91 (101.6%) | NA             | 116.79 (47.7%) | 2       | 16            |
|                                                                  | MAE (mm)  | 149.97 (61.2%) | 125.68 (51.3%) | 127.53 (52.1%) | 300.2 (122.5%)   | 279.51 (114.1%) | NA             | 123.28 (50.3%) | 2       | 16            |
|                                                                  | RMSE (mm) | 161.31 (65.8%) | 139.25 (56.8%) | 141.2 (57.6%)  | 316.52 (129.2%)  | 280.79 (114.6%) | NA             | 144.36 (58.9%) | 2       | 16            |
|                                                                  | R-squared | 0.69           | 0.63           | 0.73           | 0.38             | 0.73            | NA             | 0.52           | 2       | 16            |

**Supplementary Table 7.** Least squares linear regression model results using all paired monthly ET data for OpenET<sup>6</sup> models and flux tower ET<sup>1,2</sup> grouped by general land cover types.

|                 | Croplands<br>n=1652 |           | Shrublands<br>n=656 |           | Grasslands<br>n=626 |           | Evergreen Forests<br>n=662 |           | Mixed Forests<br>n=225 |           | Wetlands<br>n=286 |           |
|-----------------|---------------------|-----------|---------------------|-----------|---------------------|-----------|----------------------------|-----------|------------------------|-----------|-------------------|-----------|
|                 | slope               | intercept | slope               | intercept | slope               | intercept | slope                      | intercept | slope                  | intercept | slope             | intercept |
| <b>Ensemble</b> | 0.9                 | 3.23      | 0.82                | 8.17      | 0.64                | 15.59     | 1.09                       | 11.67     | 1.04                   | 15.07     | 0.79              | 34.28     |
| <b>DisALEXI</b> | 0.91                | 1.29      | 0.82                | 7.96      | 0.64                | 16.89     | 1.11                       | 14.77     | 1.07                   | 7.48      | 0.8               | 42.23     |
| <b>eeMETRIC</b> | 0.92                | 4.1       | 0.8                 | 5.63      | 0.73                | 11.02     | 1.07                       | 7.75      | 0.98                   | 8.25      | 0.82              | 36.23     |
| <b>geeSEBAL</b> | 0.84                | 2.13      | 0.88                | 14.77     | 0.5                 | 26.67     | 1.23                       | 8.26      | 1.1                    | 20.44     | 0.73              | 40.56     |
| <b>PT-JPL</b>   | 0.81                | 12.49     | 0.83                | 15.12     | 0.7                 | 22.44     | 1.03                       | 10.77     | 0.97                   | 24.37     | 0.64              | 43.69     |
| <b>SIMS</b>     | 0.88                | 14.79     | NA                  | NA        | NA                  | NA        | NA                         | NA        | NA                     | NA        | NA                | NA        |
| <b>SSEBop</b>   | 0.99                | -6.25     | 0.76                | 1.42      | 0.63                | 10.39     | 0.94                       | 22.45     | 1.06                   | 16.05     | 0.85              | 21.19     |



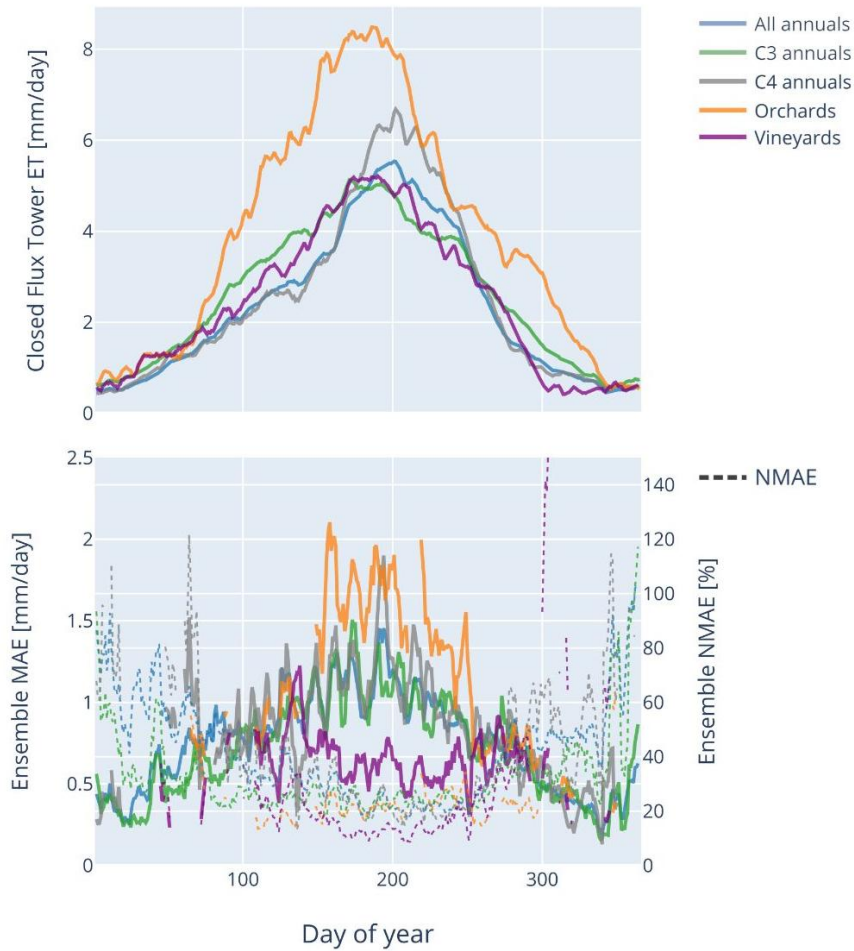

**Supplementary Figure 1.** Date of overpass OpenET<sup>6</sup> ensemble mean ET, mean-absolute-error (MAE), and MAE normalized by the mean closed flux tower ET<sup>1,2</sup> (NMAE) for each day of year using all paired model-measured data for cropland stations grouped by crop types. The NMAE data were smoothed using a 7-day moving average. Annual crops that had a mixed history of rotation between C3 and C4 crop types, e.g., corn-soy rotations, were not included in C3 or C4 results but were included in the combined (all annuals) grouping. The relative error rates for most cropland sites were typically below 25% of the mean closed flux tower ET during growing season periods; however, the low actual ET rates amplify the relative error during the colder periods of the year.

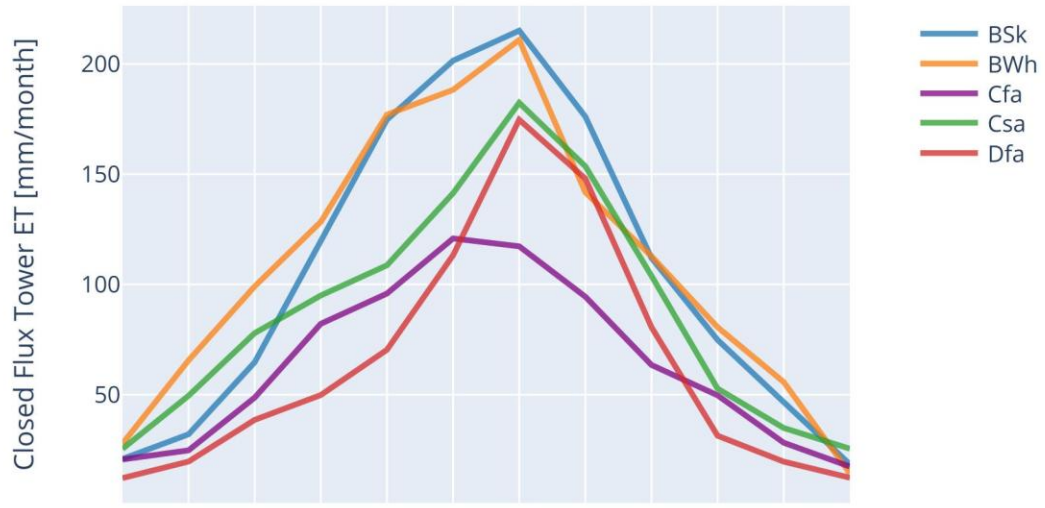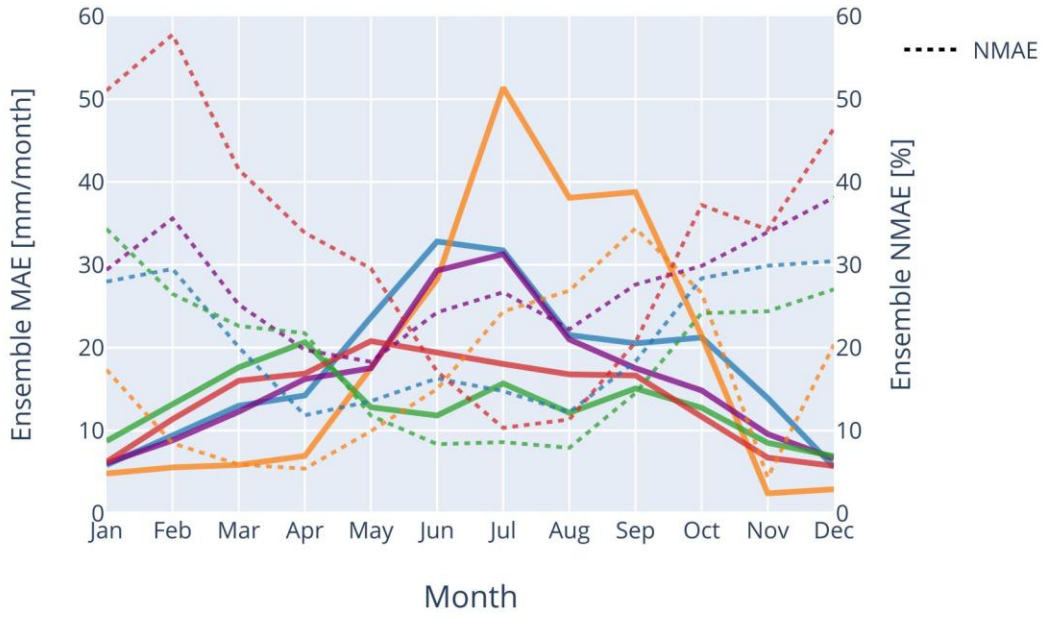

**Supplementary Figure 2.** Monthly OpenET<sup>6</sup> ensemble mean ET, mean-absolute-error (MAE), and MAE normalized by the mean closed flux tower ET<sup>1,2</sup> (NMAE) for each month using all paired model-measured data for all cropland stations grouped by their Köppen-Geiger climate classifications<sup>25</sup>. Climate zone abbreviations are defined as follows: cold and hot semi-arid steppe (Bsk + Bsh); hot and cold desert (Bwh + Bwk); humid subtropical (Cfa); hot- and warm-summer Mediterranean (Csa + Csb); and hot- and warm-summer humid continental (Dfa + Dfb). Relative errors are low for most climate zones during the summer months, typically below 15% of the mean closed flux tower ET. A different pattern is shown for desert cropland sites, with low relative error in the late winter and early spring, this may partially coincide with those sites' early growing season start. Similarly to non-growing periods for all crop types, relative error in croplands in humid regions is higher and this may be partially due to the lower ET rates in these regions.

**Supplementary Table 8.** Post-hoc Tukey test results for comparison of cropland monthly mean ET estimates from paired data (using 1,652 months from 53 stations) from each OpenET<sup>6</sup> model, the ensemble mean, and the unclosed and closed flux tower ET<sup>1,2</sup>. The upper and lower columns refer to the bounds on the 95% confidence interval for the difference between means for each group, and the null hypothesis of the test is that there is no significant difference between groups. Results suggest that the monthly mean ET for the OpenET ensemble value, PT-JPL, SIMS, and eeMETRIC are no different than the mean closed flux tower ET. Alternatively, DisALEXI, SSEBop, and geeSEBAL's monthly mean ET is statistically different from the closed flux tower ET, and their values are lower than the closed flux tower ET. Alternatively, the monthly mean unclosed flux tower ET was no different than the monthly means of DisALEXI, the ensemble value, geeSEBAL, and SSEBop, whereas eeMETRIC, SIMS, and PT-JPL had monthly mean ET values that were statistically different (higher) than the unclosed values.

| group1          | group2   | meandiff | p-adj  | lower    | upper   | reject |
|-----------------|----------|----------|--------|----------|---------|--------|
| <b>Closed</b>   | DisALEXI | -6.9776  | 0.0327 | -13.6564 | -0.2988 | TRUE   |
| <b>Closed</b>   | Ensemble | -5.7191  | 0.1639 | -12.3979 | 0.9596  | FALSE  |
| <b>Closed</b>   | PT-JPL   | -3.3806  | 0.7978 | -10.0594 | 3.2982  | FALSE  |
| <b>Closed</b>   | SIMS     | 4.567    | 0.4611 | -2.1118  | 11.2458 | FALSE  |
| <b>Closed</b>   | SSEBop   | -7.2016  | 0.0234 | -13.8803 | -0.5228 | TRUE   |
| <b>Closed</b>   | Unclosed | -12.0498 | 0.001  | -18.7286 | -5.371  | TRUE   |
| <b>Closed</b>   | eeMETRIC | -3.0847  | 0.8812 | -9.7635  | 3.5941  | FALSE  |
| <b>Closed</b>   | geeSEBAL | -11.7724 | 0.001  | -18.4512 | -5.0937 | TRUE   |
| <b>DisALEXI</b> | Ensemble | 1.2585   | 0.9    | -5.4203  | 7.9372  | FALSE  |
| <b>DisALEXI</b> | PT-JPL   | 3.597    | 0.7368 | -3.0818  | 10.2758 | FALSE  |
| <b>DisALEXI</b> | SIMS     | 11.5446  | 0.001  | 4.8658   | 18.2234 | TRUE   |
| <b>DisALEXI</b> | SSEBop   | -0.224   | 0.9    | -6.9027  | 6.4548  | FALSE  |
| <b>DisALEXI</b> | Unclosed | -5.0722  | 0.3088 | -11.751  | 1.6065  | FALSE  |
| <b>DisALEXI</b> | eeMETRIC | 3.8929   | 0.6534 | -2.7859  | 10.5717 | FALSE  |
| <b>DisALEXI</b> | geeSEBAL | -4.7948  | 0.3901 | -11.4736 | 1.8839  | FALSE  |
| <b>Ensemble</b> | PT-JPL   | 2.3385   | 0.9    | -4.3402  | 9.0173  | FALSE  |
| <b>Ensemble</b> | SIMS     | 10.2861  | 0.001  | 3.6074   | 16.9649 | TRUE   |
| <b>Ensemble</b> | SSEBop   | -1.4824  | 0.9    | -8.1612  | 5.1963  | FALSE  |
| <b>Ensemble</b> | Unclosed | -6.3307  | 0.0798 | -13.0095 | 0.3481  | FALSE  |
| <b>Ensemble</b> | eeMETRIC | 2.6344   | 0.9    | -4.0443  | 9.3132  | FALSE  |
| <b>Ensemble</b> | geeSEBAL | -6.0533  | 0.1121 | -12.7321 | 0.6255  | FALSE  |
| <b>PT-JPL</b>   | SIMS     | 7.9476   | 0.0069 | 1.2688   | 14.6264 | TRUE   |
| <b>PT-JPL</b>   | SSEBop   | -3.821   | 0.6737 | -10.4997 | 2.8578  | FALSE  |
| <b>PT-JPL</b>   | Unclosed | -8.6692  | 0.0019 | -15.348  | -1.9904 | TRUE   |
| <b>PT-JPL</b>   | eeMETRIC | 0.2959   | 0.9    | -6.3829  | 6.9747  | FALSE  |
| <b>PT-JPL</b>   | geeSEBAL | -8.3918  | 0.0031 | -15.0706 | -1.7131 | TRUE   |
| <b>SIMS</b>     | SSEBop   | -11.7686 | 0.001  | -18.4473 | -5.0898 | TRUE   |
| <b>SIMS</b>     | Unclosed | -16.6168 | 0.001  | -23.2956 | -9.9381 | TRUE   |
| <b>SIMS</b>     | eeMETRIC | -7.6517  | 0.0114 | -14.3305 | -0.9729 | TRUE   |
| <b>SIMS</b>     | geeSEBAL | -16.3394 | 0.001  | -23.0182 | -9.6607 | TRUE   |
| <b>SSEBop</b>   | Unclosed | -4.8483  | 0.3736 | -11.527  | 1.8305  | FALSE  |
| <b>SSEBop</b>   | eeMETRIC | 4.1169   | 0.5903 | -2.5619  | 10.7956 | FALSE  |
| <b>SSEBop</b>   | geeSEBAL | -4.5709  | 0.4599 | -11.2496 | 2.1079  | FALSE  |
| <b>Unclosed</b> | eeMETRIC | 8.9651   | 0.001  | 2.2863   | 15.6439 | TRUE   |
| <b>Unclosed</b> | geeSEBAL | 0.2774   | 0.9    | -6.4014  | 6.9562  | FALSE  |
| <b>eeMETRIC</b> | geeSEBAL | -8.6877  | 0.0018 | -15.3665 | -2.009  | TRUE   |

**Supplementary Table 9.** Post-hoc Tukey test results for comparison of cropland growing season mean ET estimates from paired data (using 177 growing season totals from 39 stations) from



each OpenET<sup>6</sup> model, the ensemble mean, and the unclosed and closed flux tower ET<sup>1,2</sup>. The upper and lower columns refer to the bounds on the 95% confidence interval for the difference between means for each group, and the null hypothesis of the test is that there is no significant difference between groups. At growing season aggregation periods no model's mean ET was statistically different from the mean closed or unclosed flux tower ET.

| <b>group1</b>   | <b>group2</b> | <b>meandiff</b> | <b>p-adj</b> | <b>lower</b> | <b>upper</b> | <b>reject</b> |
|-----------------|---------------|-----------------|--------------|--------------|--------------|---------------|
| <b>Closed</b>   | DisALEXI      | -22.6187        | 0.9          | -125.4256    | 80.1881      | FALSE         |
| <b>Closed</b>   | Ensemble      | -13.9134        | 0.9          | -116.7203    | 88.8934      | FALSE         |
| <b>Closed</b>   | PT-JPL        | -3.7124         | 0.9          | -106.5193    | 99.0944      | FALSE         |
| <b>Closed</b>   | SIMS          | 51.0147         | 0.8151       | -51.7922     | 153.8215     | FALSE         |
| <b>Closed</b>   | SSEBop        | -16.7235        | 0.9          | -119.5304    | 86.0834      | FALSE         |
| <b>Closed</b>   | Unclosed      | -87.2393        | 0.1729       | -190.0462    | 15.5676      | FALSE         |
| <b>Closed</b>   | eeMETRIC      | 11.3371         | 0.9          | -91.4698     | 114.1439     | FALSE         |
| <b>Closed</b>   | geeSEBAL      | -67.3389        | 0.5164       | -170.1457    | 35.468       | FALSE         |
| <b>DisALEXI</b> | Ensemble      | 8.7053          | 0.9          | -94.1015     | 111.5122     | FALSE         |
| <b>DisALEXI</b> | PT-JPL        | 18.9063         | 0.9          | -83.9006     | 121.7132     | FALSE         |
| <b>DisALEXI</b> | SIMS          | 73.6334         | 0.3923       | -29.1734     | 176.4403     | FALSE         |
| <b>DisALEXI</b> | SSEBop        | 5.8953          | 0.9          | -96.9116     | 108.7021     | FALSE         |
| <b>DisALEXI</b> | Unclosed      | -64.6205        | 0.5661       | -167.4274    | 38.1863      | FALSE         |
| <b>DisALEXI</b> | eeMETRIC      | 33.9558         | 0.9          | -68.8511     | 136.7627     | FALSE         |
| <b>DisALEXI</b> | geeSEBAL      | -44.7201        | 0.9          | -147.527     | 58.0867      | FALSE         |
| <b>Ensemble</b> | PT-JPL        | 10.201          | 0.9          | -92.6059     | 113.0078     | FALSE         |
| <b>Ensemble</b> | SIMS          | 64.9281         | 0.5605       | -37.8788     | 167.735      | FALSE         |
| <b>Ensemble</b> | SSEBop        | -2.8101         | 0.9          | -105.6169    | 99.9968      | FALSE         |
| <b>Ensemble</b> | Unclosed      | -73.3259        | 0.3985       | -176.1327    | 29.481       | FALSE         |
| <b>Ensemble</b> | eeMETRIC      | 25.2505         | 0.9          | -77.5564     | 128.0573     | FALSE         |
| <b>Ensemble</b> | geeSEBAL      | -53.4254        | 0.771        | -156.2323    | 49.3814      | FALSE         |
| <b>PT-JPL</b>   | SIMS          | 54.7271         | 0.7472       | -48.0797     | 157.534      | FALSE         |
| <b>PT-JPL</b>   | SSEBop        | -13.0111        | 0.9          | -115.8179    | 89.7958      | FALSE         |
| <b>PT-JPL</b>   | Unclosed      | -83.5269        | 0.2214       | -186.3337    | 19.28        | FALSE         |
| <b>PT-JPL</b>   | eeMETRIC      | 15.0495         | 0.9          | -87.7574     | 117.8564     | FALSE         |
| <b>PT-JPL</b>   | geeSEBAL      | -63.6264        | 0.5843       | -166.4333    | 39.1804      | FALSE         |
| <b>SIMS</b>     | SSEBop        | -67.7382        | 0.5091       | -170.545     | 35.0687      | FALSE         |
| <b>SIMS</b>     | Unclosed      | -138.254        | 0.001        | -241.0608    | -35.4471     | TRUE          |
| <b>SIMS</b>     | eeMETRIC      | -39.6776        | 0.9          | -142.4845    | 63.1292      | FALSE         |
| <b>SIMS</b>     | geeSEBAL      | -118.3535       | 0.0108       | -221.1604    | -15.5467     | TRUE          |
| <b>SSEBop</b>   | Unclosed      | -70.5158        | 0.4554       | -173.3227    | 32.2911      | FALSE         |
| <b>SSEBop</b>   | eeMETRIC      | 28.0606         | 0.9          | -74.7463     | 130.8674     | FALSE         |
| <b>SSEBop</b>   | geeSEBAL      | -50.6154        | 0.8224       | -153.4222    | 52.1915      | FALSE         |
| <b>Unclosed</b> | eeMETRIC      | 98.5763         | 0.0725       | -4.2305      | 201.3832     | FALSE         |
| <b>Unclosed</b> | geeSEBAL      | 19.9004         | 0.9          | -82.9064     | 122.7073     | FALSE         |
| <b>eeMETRIC</b> | geeSEBAL      | -78.6759        | 0.2975       | -181.4828    | 24.1309      | FALSE         |

## **Supplementary Discussion 2.** Ensemble outlier removal and spatial inter-model variability

Sophisticated, skill-based methods exist for integrating multiple RSET models and other data to improve RSET accuracy; however, they often employ data- and computationally-intensive approaches such as stochastic Bayesian averaging and other machine learning methods<sup>26,27</sup>. These methods can be difficult to communicate to stakeholders, and are prone to overfitting. Simple ensemble methods like the arithmetic mean may provide similar levels of accuracy<sup>28</sup> while offering a variety of advantages. In terms of accuracy at the flux sites, the simple mean after removal of outliers using the MAD approach gave comparable results to the simple arithmetic mean, the median, and standard deviation outlier removal approaches (Supplementary Table 10).

To characterize the spatial occurrence of outliers and to illustrate inter-model variability, we mapped the mean growing season (April through October) ET for each model and the ensemble with and without outlier removal, using the full OpenET domain over the period 2016–2022 (Extended Data Fig. 's 7–8 and Supplementary Figures 3–9). We found minor differences between the ensemble mean with and without outlier removal at most cropland pixels; however, outlier removal provides a layer of confidence in regions with sparse ground measurements where we know little about individual model biases<sup>6</sup>.

In cropland pixels, the simple mean tended to be slightly higher than the MAD ensemble, indicating that, more often than not, a high estimate was discarded. However, the difference between the two methods rarely exceeded 10% of the mean growing season ET as calculated by the MAD approach (Supplementary Figure 3). In intensive agricultural regions, such as the California Central Valley and large fractions of the Central Plains, typically only a single or no model was identified as an outlier during growing season months (Extended Data Fig. 7). SIMS was deemed an outlier more often than other models in cropland pixels at a 20% frequency for growing season months, whereas the other models were deemed outliers at 8–10% frequency (Supplementary Table 11). Each model showed distinct spatial patterns in their divergence from the ensemble (Extended Data Fig. 8). Some of the substantial model biases we observe at the flux stations also show up in most cropland pixels over the growing season average, albeit with regional variations and exceptions. For example, the high relative bias of SIMS and low bias of geeSEBAL are most clearly pronounced in continental regions of the Central Plains and Midwest.

**Supplementary Table 10.** Monthly statistical metrics for several OpenET<sup>6</sup> ensemble approaches against closed flux ET<sup>1,2</sup> grouped by general land cover types. The 2xMADe, 2.5xMADe, and 3xMADe columns represent the ensemble approach where outlier model values are removed from the ensemble if they are outside of the band defined by the median absolute deviation (MAD), which is also adjusted by a coefficient. After removal of up to two models, defined by the MAD band, the ensemble mean is taken on a per-pixel basis to form the ensemble. The ensemble method adopted by OpenET was the 2MADe approach. See the Methods section of the article for a full description of the MAD approach. SAM represents the simple arithmetic mean without outlier removal; the STDEV columns use a per-pixel band defined by the sample standard deviation to identify outliers, much like the MAD approach. The “Throw 1” approach involves removing the furthest model from the mean and then computing the ensemble mean. “Throw 2” involves another iteration whereby the two models furthest from the mean will always be removed. To keep comparisons consistent, only one model was ever removed from any ensemble approach in non-agricultural locations because SIMS was not implemented in those instances.

| Monthly ET Metrics for Different Ensemble Methods          |           |        |          |        |       |        |            |             |         |         |         |               |
|------------------------------------------------------------|-----------|--------|----------|--------|-------|--------|------------|-------------|---------|---------|---------|---------------|
| Land Cover Type                                            | Statistic | 2xMADe | 2.5xMADe | 3xMADe | SAM   | Median | 1.5xSTDDEV | 1.75xSTDDEV | Throw 1 | Throw 2 | N sites | N data points |
| Croplands<br>Mean station ET =<br>91 (mm/month)            | Slope     | 0.92   | 0.92     | 0.92   | 0.93  | 0.92   | 0.92       | 0.92        | 0.93    | 0.92    | 53      | 1652          |
|                                                            | MBE (mm)  | -5.27  | -5.16    | -5.07  | -4.5  | -5.06  | -5.3       | -4.91       | -4.5    | -5.31   | 44      | 1638          |
|                                                            | MAE (mm)  | 15.84  | 15.8     | 15.73  | 15.31 | 15.74  | 15.94      | 15.6        | 15.31   | 16.08   | 44      | 1638          |
|                                                            | RMSE (mm) | 20.44  | 20.27    | 20.18  | 19.59 | 20.32  | 20.56      | 19.97       | 19.59   | 20.76   | 44      | 1638          |
|                                                            | R-squared | 0.9    | 0.9      | 0.9    | 0.91  | 0.9    | 0.9        | 0.9         | 0.91    | 0.9     | 53      | 1652          |
| Evergreen<br>Forests<br>Mean station ET =<br>62 (mm/month) | Slope     | 1.24   | 1.24     | 1.24   | 1.24  | 1.24   | 1.24       | 1.24        | 1.24    | 1.23    | 14      | 662           |
|                                                            | MBE (mm)  | 16.8   | 16.75    | 16.82  | 17.09 | 16.36  | 16.87      | 16.95       | 16.65   | 16.03   | 13      | 660           |
|                                                            | MAE (mm)  | 24.68  | 24.44    | 24.31  | 24.02 | 24.9   | 24.49      | 24.05       | 25.1    | 25.93   | 13      | 660           |
|                                                            | RMSE (mm) | 29.96  | 29.65    | 29.53  | 28.9  | 30.2   | 29.72      | 28.94       | 30.45   | 31.52   | 13      | 660           |
|                                                            | R-squared | 0.62   | 0.63     | 0.63   | 0.65  | 0.61   | 0.63       | 0.64        | 0.61    | 0.59    | 14      | 662           |
| Grasslands<br>Mean station ET =<br>40 (mm/month)           | Slope     | 0.87   | 0.87     | 0.88   | 0.89  | 0.87   | 0.87       | 0.89        | 0.86    | 0.86    | 18      | 626           |
|                                                            | MBE (mm)  | -0.88  | -0.67    | -0.27  | 0.81  | -0.73  | -0.64      | 0.7         | -1.42   | -1.8    | 18      | 626           |
|                                                            | MAE (mm)  | 18.02  | 17.8     | 17.8   | 17.8  | 18.23  | 17.88      | 17.86       | 18.31   | 19.04   | 18      | 626           |
|                                                            | RMSE (mm) | 22.72  | 22.57    | 22.63  | 22.83 | 23.06  | 22.61      | 22.87       | 22.95   | 24.01   | 18      | 626           |
|                                                            | R-squared | 0.54   | 0.54     | 0.55   | 0.54  | 0.53   | 0.55       | 0.54        | 0.54    | 0.51    | 18      | 626           |
| Mixed Forests<br>Mean station ET =<br>62 (mm/month)        | Slope     | 1.19   | 1.19     | 1.19   | 1.19  | 1.18   | 1.19       | 1.19        | 1.18    | 1.19    | 10      | 225           |
|                                                            | MBE (mm)  | 17.72  | 17.6     | 17.9   | 17.73 | 17.23  | 17.99      | 17.86       | 17.32   | 17.44   | 10      | 225           |
|                                                            | MAE (mm)  | 19.76  | 19.76    | 20.02  | 19.59 | 19.61  | 20.02      | 19.72       | 19.56   | 20.47   | 10      | 225           |
|                                                            | RMSE (mm) | 24.73  | 24.72    | 24.93  | 24.51 | 24.43  | 24.85      | 24.63       | 24.29   | 25.15   | 10      | 225           |
|                                                            | R-squared | 0.87   | 0.87     | 0.87   | 0.87  | 0.87   | 0.87       | 0.87        | 0.88    | 0.87    | 10      | 225           |
| Shrublands<br>Mean station ET =<br>31 (mm/month)           | Slope     | 0.98   | 0.98     | 0.98   | 0.99  | 0.98   | 0.98       | 0.99        | 0.98    | 0.97    | 24      | 656           |
|                                                            | MBE (mm)  | 2.27   | 2.29     | 2.31   | 2.92  | 2.41   | 2.26       | 2.84        | 1.98    | 1.43    | 24      | 656           |
|                                                            | MAE (mm)  | 15.28  | 15.16    | 15.01  | 14.45 | 15.54  | 15.35      | 14.52       | 15.78   | 16.43   | 24      | 656           |
|                                                            | RMSE (mm) | 19.27  | 19.09    | 18.93  | 18.13 | 19.39  | 19.32      | 18.2        | 19.99   | 20.56   | 24      | 656           |
|                                                            | R-squared | 0.48   | 0.48     | 0.49   | 0.52  | 0.49   | 0.48       | 0.52        | 0.46    | 0.47    | 24      | 656           |
| Wetland/<br>Riparian<br>Mean station ET =<br>88 (mm/month) | Slope     | 1.06   | 1.06     | 1.06   | 1.06  | 1.06   | 1.06       | 1.06        | 1.06    | 1.06    | 8       | 286           |
|                                                            | MBE (mm)  | 11.9   | 12.08    | 12.16  | 12.79 | 12.31  | 11.98      | 12.83       | 11.38   | 11.68   | 7       | 285           |
|                                                            | MAE (mm)  | 25.94  | 25.81    | 25.78  | 25.79 | 25.61  | 25.96      | 25.95       | 25.64   | 25.38   | 7       | 285           |
|                                                            | RMSE (mm) | 31.31  | 31.02    | 30.78  | 30.63 | 30.89  | 31.21      | 30.87       | 31.06   | 31.47   | 7       | 285           |
|                                                            | R-squared | 0.75   | 0.76     | 0.76   | 0.77  | 0.76   | 0.76       | 0.76        | 0.75    | 0.75    | 8       | 286           |

**Supplementary Table 11.** Occurrence of models used in the OpenET<sup>6</sup> ensemble after the MAD outlier removal, as a percentage, using all monthly growing season data for all pixels that were classified as croplands for each year from 2016–2022, using all pixels in the current OpenET domain.



|                          | DisALEXI | eeMETRIC | geeSEBAL | PT-JPL | SSEBop | SIMS |
|--------------------------|----------|----------|----------|--------|--------|------|
| Annual All Lands         | 85.0     | 87.1     | 86.5     | 86.2   | 89.7   | na   |
| Growing Season All Lands | 90.0     | 87.8     | 89.2     | 89.7   | 93.1   | na   |
| Annual Cropland          | 87.4     | 89.9     | 88.0     | 89.8   | 90.8   | 78.4 |
| Growing Season Cropland  | 91.9     | 92.4     | 89.5     | 92.2   | 92.8   | 79.5 |

### Supplementary Discussion 3. Potential use of OpenET data with regard to irrigation management

The scale of irrigated agriculture in terms of water use and costs is substantial, particularly in the western United States. Based on an assessment conducted in 2015, agricultural irrigation in the U.S. comprised an estimated 118,000 Mgal/day (446 million m<sup>3</sup>/day) of irrigation water withdrawals that were applied to about 63.5 million acres (25.7 million hectares); 81% of this water and 74% of the irrigated land was within the 17 most western states<sup>29</sup>. The majority of irrigation water, often over 70%, is “consumed” or lost to ET or plant tissue and not returned to the water reservoir from which it was withdrawn<sup>29</sup>. In 2018, total U.S. reported costs of off-farm water purchases was over \$1.1 billion, pumping costs were about \$2.5 billion, and other costs related to irrigation and technology maintenance were over \$2 billion<sup>30</sup>. The cost structure of irrigation varies greatly by region, farm size, and irrigation type. Major expenses include the cost of water if purchased off site, pumping costs, and maintenance costs. Thus, while aggregate expenditures are substantial, potential cost savings resulting from use of ET data are difficult to generalize.

Environmental costs may be considered as well. For instance, most water (around 52%) used for irrigation in the U.S. comes from groundwater reservoirs<sup>29</sup>. High rates of groundwater withdrawal can result in lowered water tables due to extraction rates exceeding recharge, resulting in aquifer compaction land subsidence<sup>31</sup>, aquifer contamination<sup>32</sup> and increased pumping costs. Withdrawals from both surface and groundwater thus deplete resource availability for environmental, municipal, and industrial uses.

The high economic and environmental costs of irrigation have resulted in incentives to reduce water consumption through irrigation strategies that may benefit from operational production of ET data. OpenET data can help irrigators manage applied irrigation water resources. For instance, daily data from the system might be used to guide ET-based irrigation scheduling operations<sup>33,34</sup> by estimating crop water consumption since the last wetting event. To calculate ET replacement, a conservative approach might involve summing ET and the associated average error for the crop type and time of year. Such use of an RSET framework for irrigation scheduling may or may not lead to water reductions in a given situation, depending on efficiency of prevailing irrigation practices on a given farm. Such efficiency is sensitive to both regional water availability and individual farm management strategies, which in turn are influenced by

economic and social conditions as well as individual grower decisions reflecting risk aversion and overall familiarity with irrigation practices<sup>35</sup>.

To directly quantify the benefits of readily accessible ET information through platforms such as OpenET, a project is underway that explores the economic and social benefits of adopting RSET for irrigation management in California<sup>36</sup>. The study focuses on almond orchards and wine grape vineyards, cropping systems where RSET model performance surpassed that of others examined in the study, suggesting greater adoption potential for irrigation management strategies. Water savings from RSET adoption will be quantified by comparing current irrigation management practices with a potential future state that utilizes RSET. Specifically, two approaches will be taken: the “cost savings to farmers,” determined by surface water prices and groundwater pumping costs, and a broader “economic value of water saved,” drawn from California’s water market data. These savings can offer direct economic benefit for growers, as well as broader social value in terms of sustained or expanded resources available for allocation to non-farm uses. This work aims to explore the value of RSET in almond and wine grape production and may possibly offer a template to evaluate benefits more widely across landscapes evaluated under the current study.

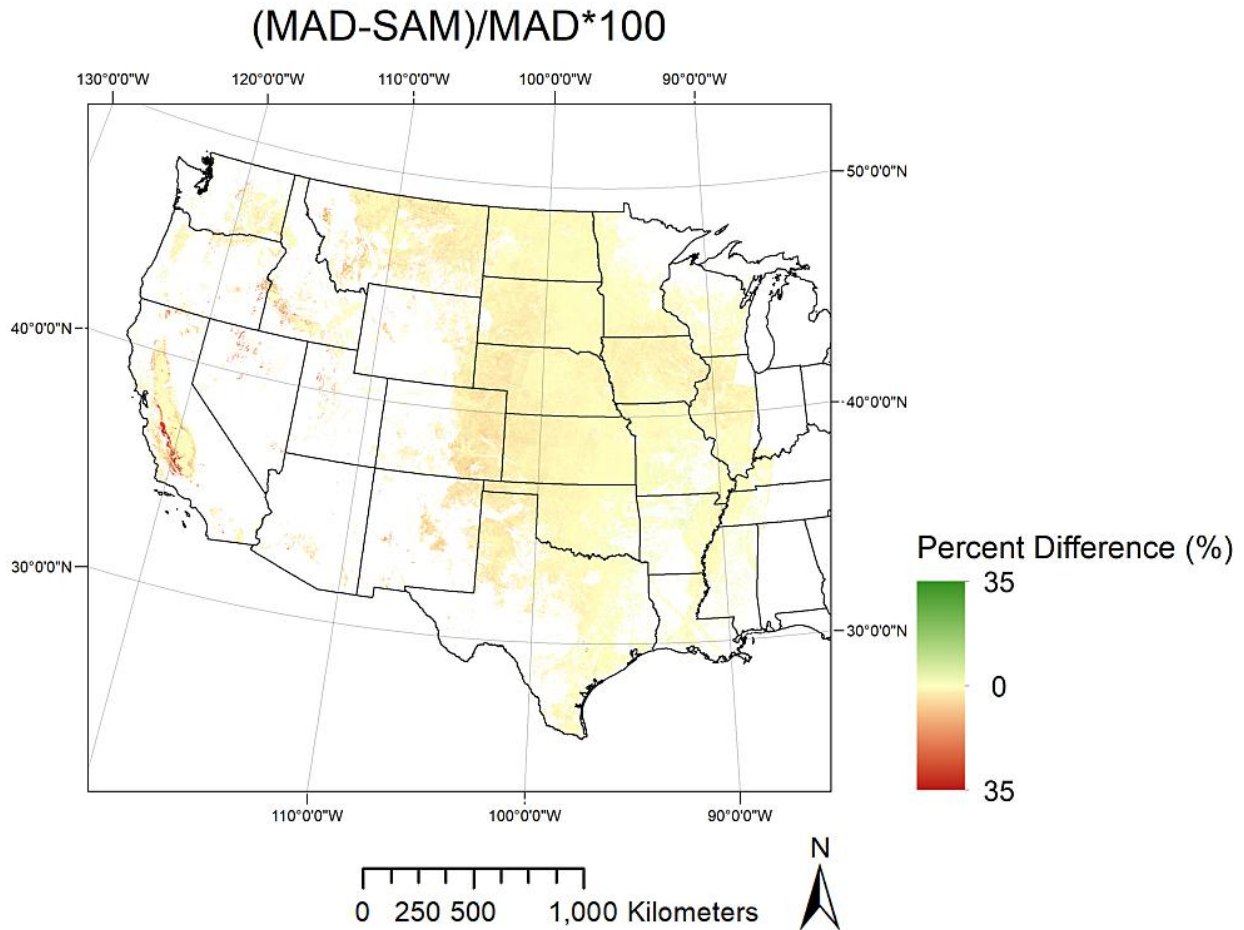

**Supplementary Figure 3.** Difference between mean growing season (April through October) OpenET<sup>6</sup> ensemble ET using the simple arithmetic mean (SAM) and the median absolute deviation (MAD) outlier removal ensemble mean as a percentage of the MAD growing season mean ET. Mean growing season ET values were calculated using monthly data from all pixels that were classified as croplands for each year from 2016–2022.

## Cropland Pixel Ensemble Mean Growing Season ET

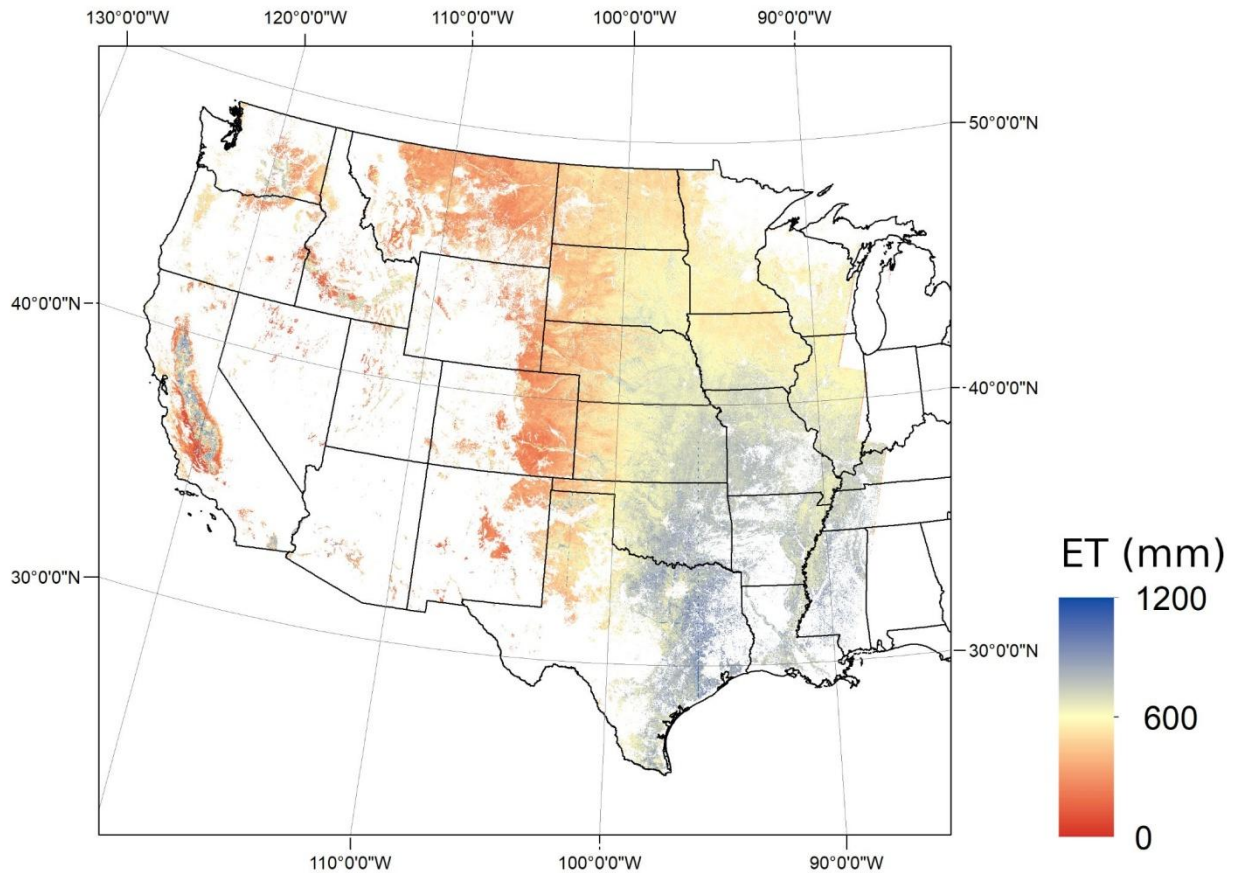

**Supplementary Figure 4.** The OpenET<sup>6</sup> ensemble mean growing season (April through October) ET for cropland pixels using the median absolute deviation (MAD) outlier removal ensemble approach. Monthly ET from 2016–2022 was used to build the map.

# MAD - SAM

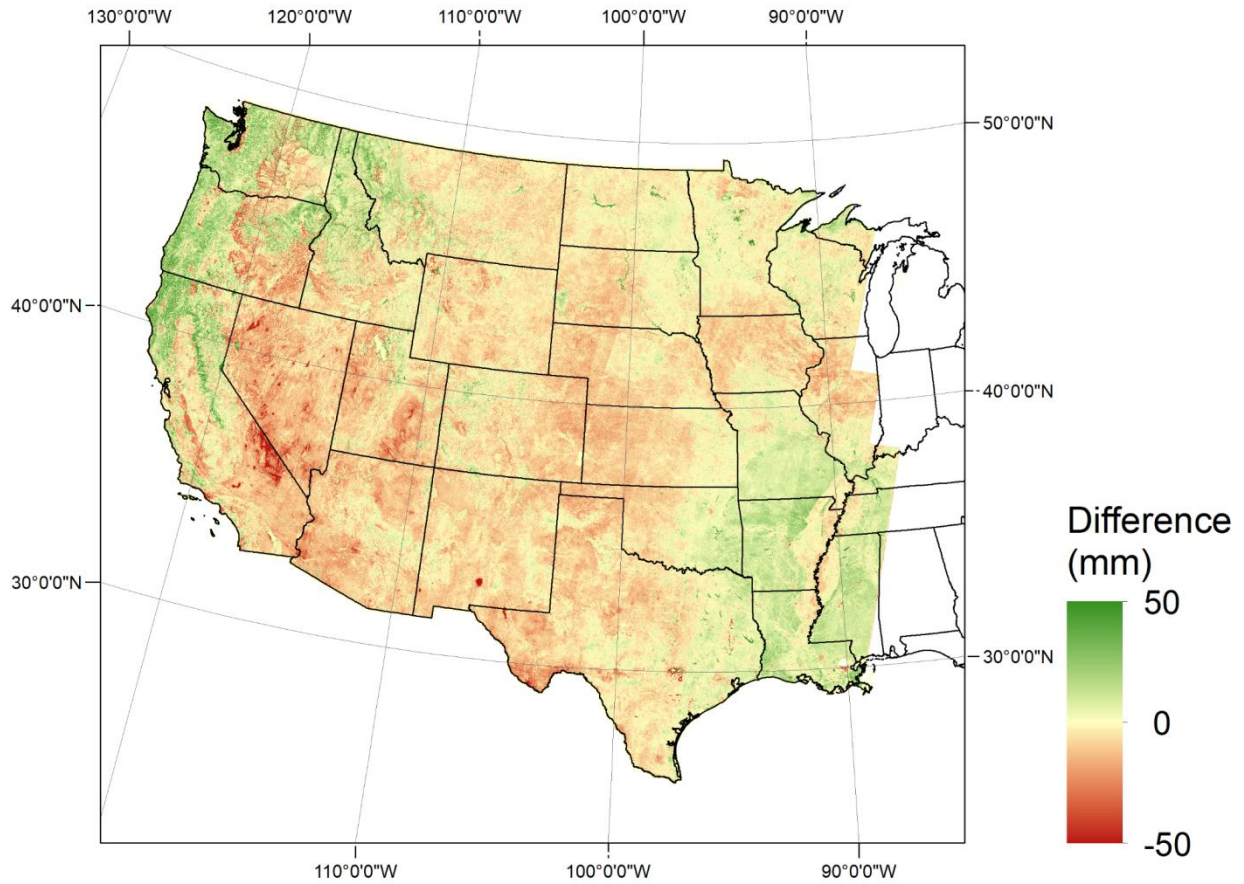

**Supplementary Figure 5.** The spatial differences between the OpenET<sup>6</sup> ensemble mean growing season (April through October) ET for all pixels using the median absolute deviation (MAD) outlier removal approach and the simple arithmetic mean (SAM). Monthly ET from 2016–2022 was used to build the map.



## Average Model Count in Ensemble

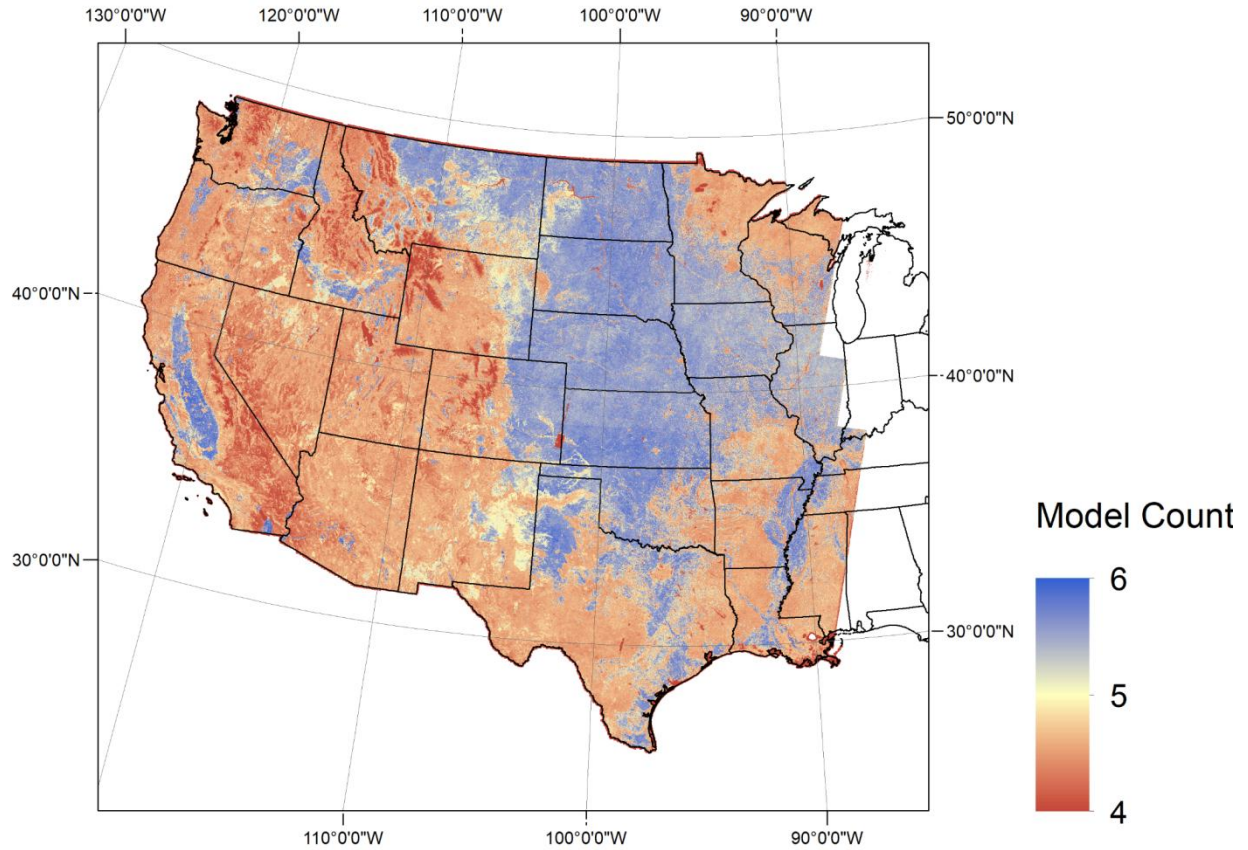

**Supplementary Figure 6.** The average count of models used in the OpenET<sup>6</sup> ensemble after median absolute deviation (MAD) outlier removal using all growing season monthly data from 2016–2022. A value of six indicates that no model was identified as an outlier, while four is the lower limit where a maximum of two models were removed as outliers before taking the ensemble mean.

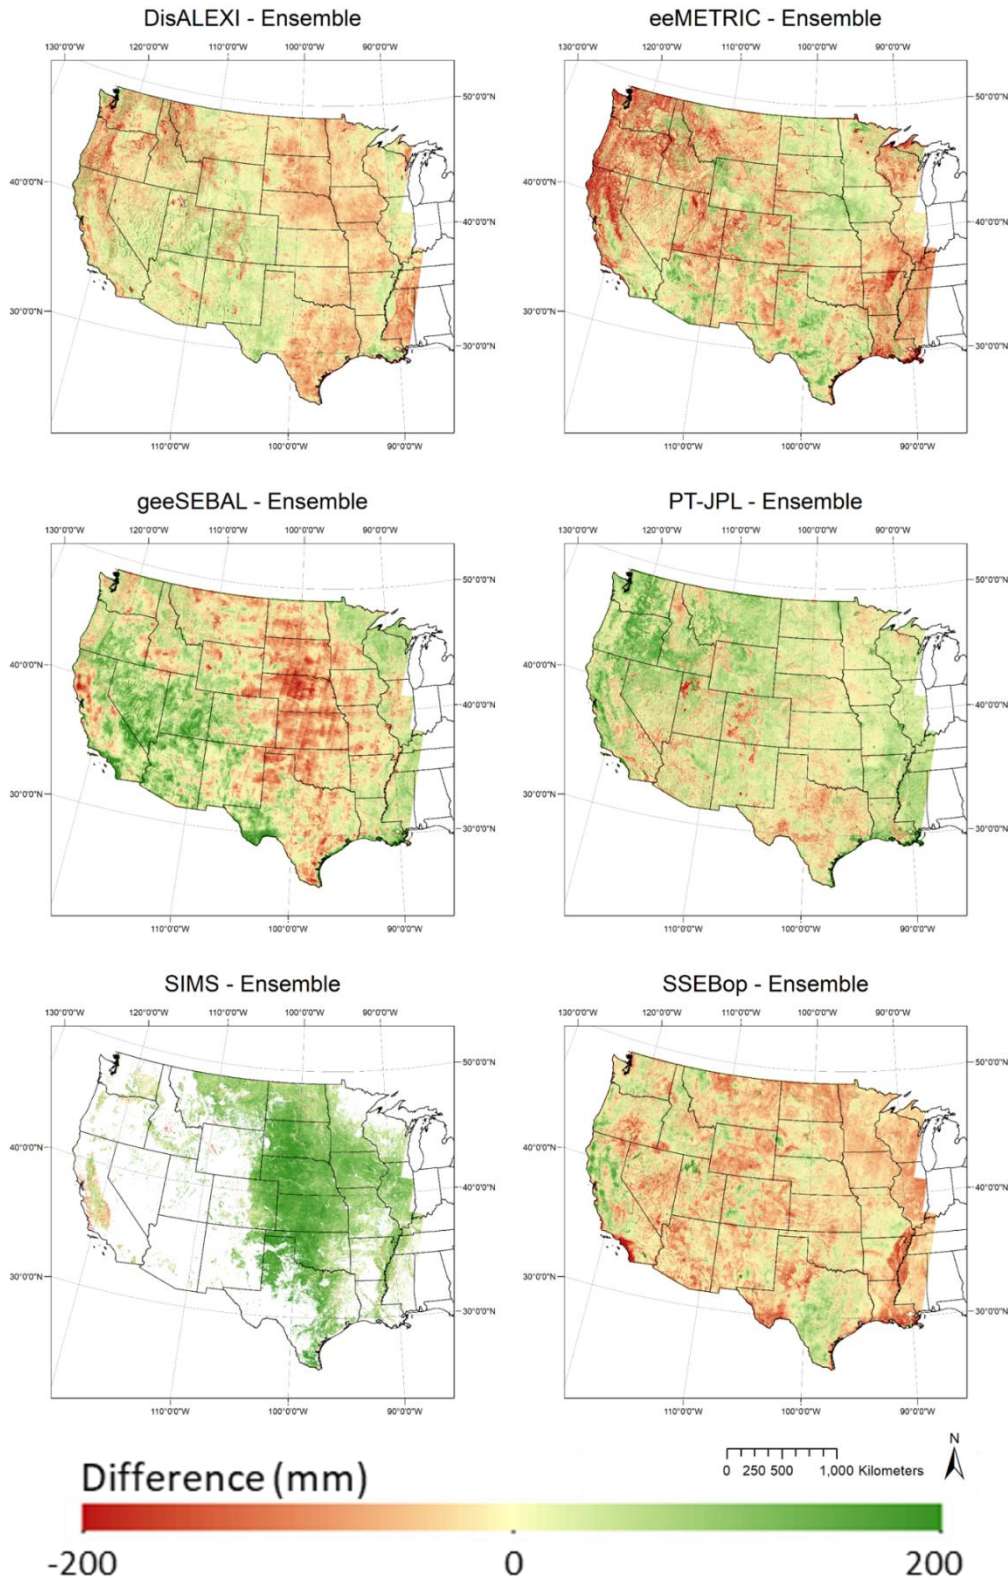

**Supplementary Figure 7.** Difference between mean growing season (April through October) ET from each OpenET<sup>6</sup> model minus the ensemble mean using all monthly data from all pixels for



each year from 2016–2022. See Supplementary Discussion 3 for a discussion of the Landsat striping exhibited by geeSEBAL.

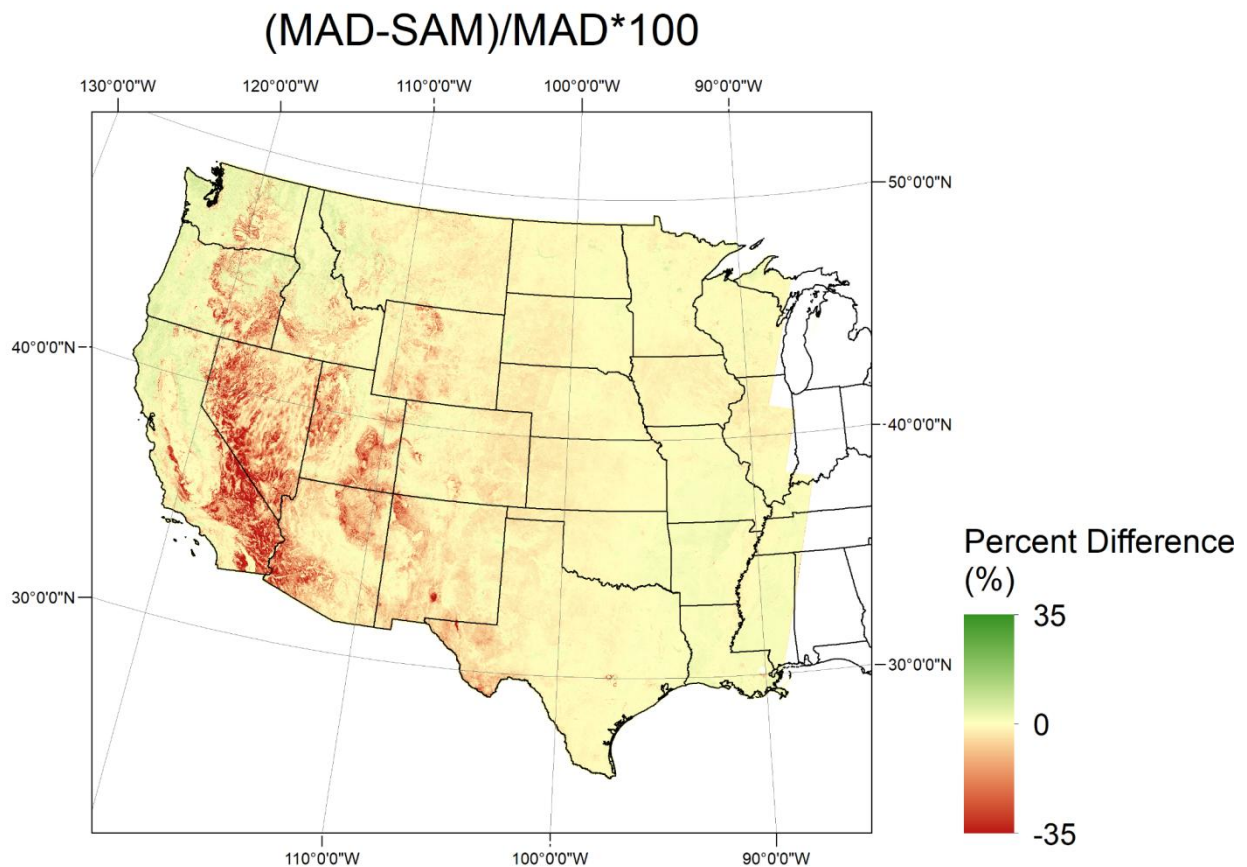

**Supplementary Figure 8.** Difference between mean growing season (April through October) OpenET<sup>6</sup> ET using the simple arithmetic mean (SAM) and the median absolute deviation (MAD) outlier removal ensemble mean as a percentage of the MAD growing season mean ET. Mean growing season ET values were calculated using monthly data from all pixels for each year from 2016–2022. Based on the long-term model differences from the ensemble (Supplementary Figure 5) it appears that geeSEBAL was frequently identified as an outlier in the western arid/semi-arid non-agricultural pixels, and it was typically estimating higher ET compared to the other models.

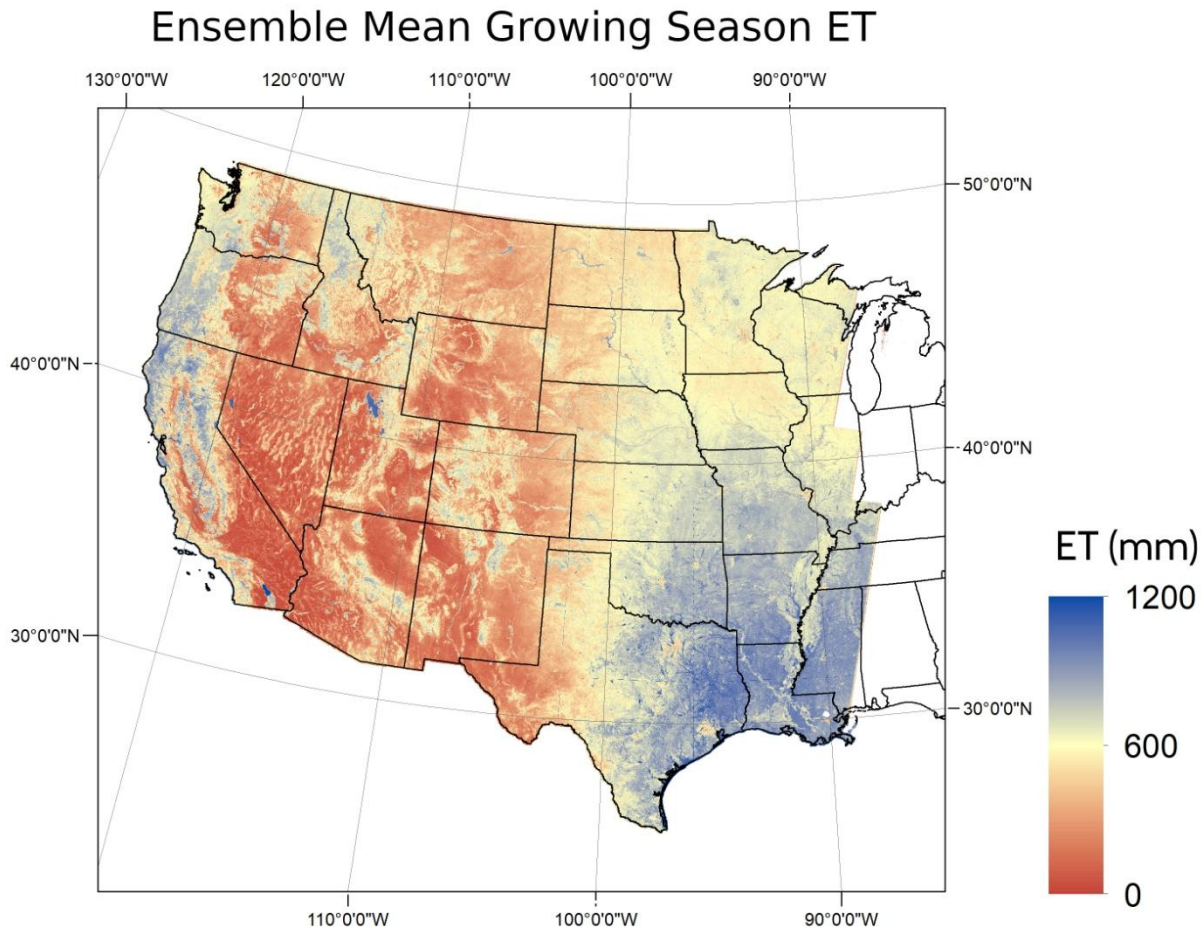

**Supplementary Figure 9.** The OpenET<sup>6</sup> ensemble mean growing season (April through October) ET for all pixels using the median absolute deviation (MAD) outlier removal ensemble approach. Monthly ET from 2016–2022 was used to build the map.

#### **Supplementary Discussion 4.** Landsat striping data artifact

Some of the surface energy balance (SEB) modeling approaches in the OpenET<sup>6</sup> ensemble are affected by environmental conditions related to the model domain area. For instance, geeSEBAL is a domain-dependent model, in which the results of ET estimates, in terms of distribution, amplitude and magnitude, depend on the domain area of the model. This domain area includes characteristics such as size area to select the endmembers, climate conditions, and land cover. Given the high sensitivity of geeSEBAL to the automated calibration process based on the hot and cold endmembers for internal calibration, the aforementioned domain characteristics impact the range of both cold and hot endmembers and consequently the ET estimates, making some Landsat striping visible especially over the Great Plains. A more comprehensive assessment of the domain-dependence of SEBAL is presented by Long et al.<sup>37</sup> and by Kayser et al.<sup>38</sup>. The

OpenET team members are currently conducting comprehensive research to reduce the domain-dependency and to improve the spatial accuracy of SEB models, especially for geeSEBAL. For further information regarding model known issues, readers are encouraged to visit the OpenET webpage.

**Supplementary Table 12.** Daily and monthly linear regression slope forced through the origin (Slope) and  $r^2$  statistical metrics computed using the weighted approaches that were used by Melton et al.<sup>6</sup> to compare the OpenET ensemble against paired closed flux tower ET<sup>1,2</sup> for all cropland sites. These statistics are only provided for comparison with Melton et al.<sup>6</sup> because our calculation methods have since changed; specifically, in the current study, we did not employ weighting by the number of paired observations per site for these two statistics. Although this study incorporated over twice the number of stations and paired observations as Melton et al.<sup>6</sup>, these statistical metrics were quite similar, with monthly ensemble values being within 0.01 from one another. When employing the weighting approaches previously used in Melton et al.<sup>6</sup> to compute the slope and  $r^2$  statistics for the full datasets used in the current study, the daily ensemble  $r^2$  improved from the previous study, from 0.84 to 0.87, and the daily Slope decreased from 0.90 to 0.87. Daily data pairing was limited to days of satellite overpass (every 8 days from in the case of Landsat, assuming clear-sky conditions). Daily results for SIMS exclude soil evaporation from precipitation, which has been recently added to the SIMS model but was not included in the daily data from SIMS used in this analysis.

| Daily                           | Ensemble value | Range across individual models | N sites | N data points |
|---------------------------------|----------------|--------------------------------|---------|---------------|
| sqrt(n) weighted mean Slope     | 0.87           | 0.81 to 0.92                   | 52      | 5225          |
| sqrt(n)/n weighted pooled $r^2$ | 0.87           | 0.77 to 0.84                   | 52      | 5225          |
| Monthly                         | Ensemble value | Range across individual models | N sites | N data points |
| sqrt(n) weighted mean Slope     | 0.94           | 0.87 to 1.04                   | 44      | 1638          |
| sqrt(n)/n weighted pooled $r^2$ | 0.95           | 0.89 to 0.94                   | 44      | 1638          |

## References

1. Volk, J. M. *et al.* Development of a benchmark Eddy flux evapotranspiration dataset for evaluation of satellite-driven evapotranspiration models over the CONUS. *Agric. For. Meteorol.* **331**, 109307 (2023).
2. Volk, J. M. *et al.* Post-processed data and graphical tools for a CONUS-wide eddy flux evapotranspiration dataset. *Data Brief* 109274 (2023).
3. Baldocchi, D. Measuring fluxes of trace gases and energy between ecosystems and the atmosphere--the state and future of the eddy covariance method. *Glob. Change Biol.* **20**, 3600–3609 (2014).
4. Chu, H. *et al.* Representativeness of Eddy-Covariance flux footprints for areas surrounding AmeriFlux sites. *Agric. For. Meteorol.* **301**, 108350 (2021).
5. Leuning, R., van Gorsel, E., Massman, W. J. & Isaac, P. R. Reflections on the surface energy imbalance problem. *Agric. For. Meteorol.* **156**, 65–74 (2012).
6. Melton, F. S. *et al.* OpenET: Filling a critical data gap in water management for the western United States. *JAWRA J. Am. Water Resour. Assoc.* **58**, 971–994 (2022).
7. Mauder, M., Foken, T. & Cuxart, J. Surface-energy-balance closure over land: a review. *Bound.-Layer Meteorol.* **177**, 395–426 (2020).
8. Moore, C. Frequency response corrections for eddy correlation systems. *Bound.-Layer Meteorol.* **37**, 17–35 (1986).
9. Wang, T., Verfaillie, J., Szutu, D. & Baldocchi, D. Handily measuring sensible and latent heat exchanges at a bargain: A test of the variance-Bowen ratio approach. *Agric. For. Meteorol.* **333**, 109399 (2023).

10. Wilson, K. *et al.* Energy balance closure at FLUXNET sites. *Agric. For. Meteorol.* **113**, 223–243 (2002).
11. Stoy, P. C. *et al.* A data-driven analysis of energy balance closure across FLUXNET research sites: The role of landscape scale heterogeneity. *Agric. For. Meteorol.* **171**, 137–152 (2013).
12. Stoy, P. C. *et al.* Separating the effects of climate and vegetation on evapotranspiration along a successional chronosequence in the southeastern US. *Glob. Change Biol.* **12**, 2115–2135 (2006).
13. Franssen, H. H., Stöckli, R., Lehner, I., Rotenberg, E. & Seneviratne, S. I. Energy balance closure of eddy-covariance data: A multisite analysis for European FLUXNET stations. *Agric. For. Meteorol.* **150**, 1553–1567 (2010).
14. Barr, A. G., Morgenstern, K., Black, T. A., McCaughey, J. H. & Nesic, Z. Surface energy balance closure by the eddy-covariance method above three boreal forest stands and implications for the measurement of the CO<sub>2</sub> flux. *Agric. For. Meteorol.* **140**, 322–337 (2006).
15. Bambach, N. *et al.* Evapotranspiration uncertainty at micrometeorological scales: the impact of the eddy covariance energy imbalance and correction methods. *Irrig. Sci.* **40**, 445–461 (2022).
16. Foken, T. The energy balance closure problem: an overview. *Ecol. Appl. Publ. Ecol. Soc. Am.* **18**, 1351–1367 (2008).
17. Meyers, T. P. & Hollinger, S. E. An assessment of storage terms in the surface energy balance of maize and soybean. *Agric. For. Meteorol.* **125**, 105–115 (2004).
18. Meier, R., Davin, E. L., Swenson, S. C., Lawrence, D. M. & Schwaab, J. Biomass heat storage dampens diurnal temperature variations in forests. *Environ. Res. Lett.* **14**, 084026 (2019).

19. Montagnani, L. *et al.* Estimating the storage term in eddy covariance measurements: the ICOS methodology. *Int. Agrophysics* (2018).
20. Sauer, T. J. & Horton, R. Soil heat flux. *Micrometeorology Agric. Syst.* **47**, 131–154 (2005).
21. Brotzge, J. & Duchon, C. A field comparison among a domeless net radiometer, two four-component net radiometers, and a domed net radiometer. *J. Atmospheric Ocean. Technol.* **17**, 1569–1582 (2000).
22. Novick, K. A. *et al.* The AmeriFlux network: A coalition of the willing. *Agric. For. Meteorol.* **249**, 444–456 (2018).
23. Pastorello, G. *et al.* The FLUXNET2015 dataset and the ONEFlux processing pipeline for eddy covariance data. *Sci. Data* **7**, 1–27 (2020).
24. Eshonkulov, R. *et al.* Evaluating multi-year, multi-site data on the energy balance closure of eddy-covariance flux measurements at cropland sites in southwestern Germany. *Biogeosciences* **16**, 521–540 (2019).
25. Rubel, F., Brugger, K., Haslinger, K. & Auer, I. The climate of the European Alps: Shift of very high resolution Köppen-Geiger climate zones 1800–2100. *Meteorol. Z.* **26**, 115–125 (2017).
26. Shang, K. *et al.* DNN-MET: A deep neural networks method to integrate satellite-derived evapotranspiration products, eddy covariance observations and ancillary information. *Agric. For. Meteorol.* **308**, 108582 (2021).
27. Yao, Y. *et al.* Improving global terrestrial evapotranspiration estimation using support vector machine by integrating three process-based algorithms. *Agric. For. Meteorol.* **242**, 55–74 (2017).
28. Schwalm, C. R. *et al.* Toward “optimal” integration of terrestrial biosphere models. *Geophys. Res. Lett.* **42**, 4418–4428 (2015).
29. Dieter, C. A. *et al.* *Estimated use of water in the United States in 2015. Circular 76* <http://pubs.er.usgs.gov/publication/cir1441> (2018) doi:10.3133/cir1441.

30. USDA National Agricultural Statistics Service. 2017 Census of Agriculture.
31. Liu, Z. *et al.* Monitoring groundwater change in California's central valley using sentinel-1 and grace observations. *Geosciences* **9**, 436 (2019).
32. Jasechko, S. *et al.* Global aquifers dominated by fossil groundwaters but wells vulnerable to modern contamination. *Nat. Geosci.* **10**, 425–429 (2017).
33. Cahn, M. D. & Johnson, L. F. New approaches to irrigation scheduling of vegetables. *Horticulturae* **3**, 28 (2017).
34. Cahn, M., Smith, R. & Melton, F. Field evaluations of the CropManage decision support tool for improving irrigation and nutrient use of cool season vegetables in California. *Agric. Water Manag.* **287**, 108401 (2023).
35. Foster, T., Gonçalves, I. Z., Campos, I., Neale, C. & Brozović, N. Assessing landscape scale heterogeneity in irrigation water use with remote sensing and in situ monitoring. *Environ. Res. Lett.* **14**, 024004 (2019).
36. Nocco, M. A. *et al.* Exploring almond, water, and climate linkages with the Tree Remote sensing of Evapotranspiration eXperiment (T-REX). in vol. 2022 GC36B-05 (2022).
37. Long, D., Singh, V. P. & Li, Z. How sensitive is SEBAL to changes in input variables, domain size and satellite sensor? *J. Geophys. Res. Atmospheres* **116**, (2011).
38. Kayser, R. H. *et al.* Assessing geeSEBAL automated calibration and meteorological reanalysis uncertainties to estimate evapotranspiration in subtropical humid climates. *Agric. For. Meteorol.* **314**, 108775 (2022).

Any use of trade, firm, or product names is for descriptive purposes only and does not imply endorsement by the U.S. Government.
